# Supplementary material
Source: MDPI journal article supplement (https://www.mdpi.com/2306-5729/9/4/50)

## **Supplementary Materials**

**Title: DNA of Music: Identifying relationships among different versions of the composition Sadhukarn from Thailand, Laos and Cambodia using multivariate statistics**

**Sumetus Eambangyung <sup>1,\*</sup>, Gretel Schwörer-Kohl<sup>1</sup> and Witoon Purahong<sup>2</sup>**

<sup>1</sup> Institut für Musik, Medien- und Sprechwissenschaften (IMMS) Abteilung Musikwissenschaft, Martin—Luther—Universität Halle—Wittenberg, 06099 Halle (Saale), Germany;  
sumetus.eambangyung@student.uni-halle.de (S.E.); gretel.schwoerer@musikwiss.uni-halle.de (G.S.-K)

<sup>2</sup> Department of Soil Ecology, UFZ-Helmholtz Centre for Environmental Research, D-06120 Halle (Saale), Germany; witoon.purahong@ufz.de (W.P.)

\* Correspondence: sumetus.eambangyung@student.uni-halle.de (S.E.)

**Appendix I: Information of the 26 versions of the Sadhukarn main melody**

**Table S1** Information of the 26 versions of the Sadhukarn main melody (reproduced and modified from Eambangyung et.al., 2022, Data, <https://www.mdpi.com/2306-5729/7/11/150>)

| No | Name of version                     | Location                  | Geographical Co-Ordinate | Sources                   | Published/ Collected Year |
|----|-------------------------------------|---------------------------|--------------------------|---------------------------|---------------------------|
| 1  | Thai Fine Arts Department [TF]      | Bangkok, Thailand         | 13.759778, 100.491639    | Book (Western notation)   | 1950                      |
| 2  | Luang Bamrung Chit Chareon [TB]     | Bangkok, Thailand         | 13.759778, 100.491639    | fieldwork                 | 2015                      |
| 3  | Samran Kerdphol I [TS1]             | Ayutthaya, Thailand       | 14.42825, 100.482139     | fieldwork                 | 2015                      |
| 4  | Pinij Chaisuwan I [TP1]             | Ayutthaya, Thailand       | 14.579583, 100.511917    | fieldwork                 | 2015                      |
| 5  | Thai music ensemble of Bangkok [TK] | Bangkok, Thailand         | 13.773298, 100.559729    | Book (Thai Notation)      | 1989                      |
| 6  | Chub Sowat [TC]                     | Ayutthaya, Thailand       | 14.464167, 100.605556    | thesis (Western notation) | 1990                      |
| 7  | Chue Dontrirod [TD]                 | Ayutthaya, Thailand       | 14.458333, 100.37        | thesis (Western notation) | 1990                      |
| 8  | Tuen Phatayakul [TP]                | Petchaburi, Thailand      | 13.111944, 99.943889     | thesis (Western notation) | 1990                      |
| 9  | Thawin Attakisna [TT]               | Ayutthaya, Thailand       | 14.4625, 100.544722      | thesis (Western notation) | 1990                      |
| 10 | Pinij Chaisuwan II [TP2]            | Ayutthaya, Thailand       | 14.579583, 100.511917    | thesis (Western notation) | 1990                      |
| 11 | Rasi Phumthongsuk [TR]              | Bangkok, Thailand         | 13.725306, 100.466167    | thesis (Western notation) | 1990                      |
| 12 | Siri Nakdontri [TN]                 | Samut Songkhram, Thailand | 13.424722, 99.957222     | thesis (Western notation) | 1990                      |
| 13 | Sangobsuek Thamviharn [TW]          | Bangkok, Thailand         | 13.738358, 100.532097    | thesis (Western notation) | 1990                      |
| 14 | Samran Kerdphol II [TS2]            | Ayutthaya, Thailand       | 13.739917, 100.491722    | thesis (Western notation) | 1990                      |
| 15 | Subin Chankeaw [TJ]                 | Sing Buri, Thailand       | 14.892222, 100.317222    | thesis (Western notation) | 1990                      |
| 16 | Sadhukarn Chan Dio [TTP]            | Ayutthaya, Thailand       | 13.739917, 100.491722    | Book (Western notation)   | 2015                      |

| No | Name of version                    | Location             | Geographical Co-Ordinate | Sources                | Published/ Collected Year |
|----|------------------------------------|----------------------|--------------------------|------------------------|---------------------------|
| 17 | Keo Sonankavai I [KS1]             | Phnom Penh, Cambodia | 11.564944, 104.928111    | fieldwork              | 2014                      |
| 18 | Keo Sonankavai II [KS2]            | Phnom Penh, Cambodia | 11.564944, 104.928111    | fieldwork              | 2014                      |
| 19 | Royal University of Fine Arts [KR] | Phnom Penh, Cambodia | 11.564944, 104.928111    | fieldwork              | 2016                      |
| 20 | Ban Pang Lang [IP]                 | Sa Kaeo, Thailand    | 14.008111, 102.792194    | fieldwork              | 2016                      |
| 21 | Ban Nong Sai [IN]                  | Buriram, Thailand    | 14.523544, 102.771032    | thesis (Thai Notation) | 2015                      |
| 22 | Boonthiang Sisackda I [LB1]        | Vientiane, LAO       | 17.948722, 102.642167    | fieldwork              | 2014                      |
| 23 | Boonthiang Sisackda II [LB2]       | Vientiane, LAO       | 17.948722, 102.642167    | fieldwork              | 2014                      |
| 24 | Boonthiang Sisackda III [LB3]      | Vientiane, LAO       | 17.948722, 102.642167    | modified               | 2014                      |
| 25 | Boonyadech Meunsanit [LY]          | Luang Prabang, LAO   | 20.21, 102.62            | fieldwork              | 2014                      |
| 26 | Wat Reach Bo Pinpeat ensemble [KW] | Siem Reap, Cambodia  | 13.35747124, 103.8620557 | media                  | 2023.                     |

Data on different parameters (rhyme structure, pillar tone, rhythmic and melodic patterns, intervals, pitches, and combinations) of 25 different versions of Sathukarn main melodies from Thailand, Laos, and Cambodia can be derived from Western notation, Thai notation, and rhyme structure which were published and are freely available at <https://www.mdpi.com/2306-5729/7/11/150> (accessed on 31 October 2022). Western notation, Thai notation, and rhyme structure of Wat Reach Bo Pinpeat ensemble [KW] are presented below.

## Western notation

### Sathukar (សាធុការ)

for large gongs circle

Wat Reach Bo Pinpeat ensemble

Introduction

A tempo

7

11

15

19

23

27

31

35

39

43



47



51



55



59



63



67



71



75



79



83



87



This image displays ten staves of musical notation, each beginning with a measure number. The notation is written on a single treble clef staff. The notes are primarily eighth and sixteenth notes, often beamed together in groups. Various notes are highlighted with colored dots: blue, pink, orange, red, purple, and cyan. The staves are numbered 43, 47, 51, 55, 59, 63, 67, 71, 75, 79, and 83. The notation continues for three measures after the last numbered staff (83).

87

91

95

99

103

107

111

115

119

123

127

131

The musical score consists of ten staves, each containing four measures of music. The notes are primarily eighth and sixteenth notes, often beamed together. The key signature is one flat (B-flat). The score includes various musical notations such as slurs, ties, and dynamic markings. The notes are color-coded: green, purple, orange, blue, light green, and red. The score ends with a double bar line and a repeat sign.

## Thai notation

### Sathukar

Wat Reach Bo Pinpeat ensemble

|       |         |         |              |         |         |         |           |             |                |    |
|-------|---------|---------|--------------|---------|---------|---------|-----------|-------------|----------------|----|
| Intro | - រ     | រុំ     | ឆត រុំ តា ឆរ | រុំ     | រុំ     | - ឆ - ឆ | - - - រុំ | - រុំ - រុំ | តា ឆ ឆ - - - រ | 0  |
|       | ឆ       | ឆ       |              | រុំ     | រុំ     | ឆ ឆ     | រ         | រ រ         | រុំ ឆ ឆ ឆ      | ឆ  |
| 1.1   | - - - រ | - ឆ -   | រ រ -        | រ រ - រ | - ឆ - រ | - ឆ -   | រ រ រ     | រ រ រ       | រ រ រ          | 1  |
|       | រ       | រ       | រ            | រ       | រ       | ឆ ឆ     | ឆ ឆ       | រ           | រ              | រ  |
|       | រ រ     | រ រ     | - - - រ      | - ឆ - រ | - ឆ - រ | រ រ     | រ រ       | - ឆ - ឆ     |                | 2  |
|       | រ       | រ       | រ រ          | ឆ ឆ     | ឆ ឆ     | រ រ     | រ រ       | រ រ         | រ រ            | រ  |
|       | - រ - រ | - រ -   | រ រ រ        | ឆ ឆ ឆ   | - រ - ឆ | - ឆ - រ | - ឆ -     | រ រ - ឆ     |                | 3  |
|       | រ រ     | រ រ     | ឆ ឆ          | ឆ ឆ     | ឆ ឆ     | រ រ     | រ រ       | រ រ         | ឆ ឆ            | ឆ  |
|       | - - រ   | - រ - រ | - រ រ        | - ឆ - ឆ | - រ - រ | - រ -   | រ រ រ     | ឆ ឆ - រ     |                | 4  |
|       | រ       | រ       | រ រ          | ឆ ឆ     | រ រ     | រ រ     | រ រ       | ឆ ឆ         | រ រ            | រ  |
| 2.1   | - រ - ឆ | - - រ   | - ឆ -        | រ រ រ   | រ រ     | រ រ     | រ រ       | រ រ         | រ រ            | 5  |
|       | រ ឆ     | រ       | ឆ រ          | រ រ     | រ រ     | រ រ     | រ រ       | រ រ         | រ រ            | រ  |
|       | - រ - រ | - រ -   | រ រ រ        | ឆ ឆ ឆ   | - រ រ   | - រ រ   | - រ រ     | រ រ -       | ឆ ឆ -          | 6  |
|       | រ រ     | រ រ     | ឆ ឆ          | រ រ     | រ រ     | រ រ     | រ រ       | រ រ         | រ រ            | រ  |
|       | - ឆ - រ | - រ -   | រ រ រ        | ឆ ឆ ឆ   | រ រ រ   | - រ - រ | - រ -     | រ រ រ       | ឆ ឆ ឆ          | 7  |
|       | រ       | ឆ ឆ     | ឆ ឆ          | រ រ     | រ រ     | រ រ     | រ រ       | រ រ         | ឆ ឆ            | រ  |
|       | - - - រ | - រ - រ | - - រ        | - រ - ឆ | - រ - រ | - រ -   | រ រ រ     | ឆ ឆ - រ     |                | 8  |
|       | ឆ ឆ     | រ រ     | រ រ          | រ រ     | រ រ     | រ រ     | រ រ       | រ រ         | រ រ            | រ  |
| 3.1   | - រ -   | ឆ ឆ - រ | - -          | - រ - រ | - រ រ   | - រ រ   | - រ រ     | - រ រ       | - រ -          | 9  |
|       | រ ឆ     | រ រ     | រ រ          | រ រ     | រ រ     | រ រ     | រ រ       | រ រ         | រ រ            | រ  |
|       | - រ - រ | - រ -   | រ រ រ        | ឆ ឆ ឆ   | - រ - ឆ | - ឆ - រ | - ឆ -     | រ រ - ឆ     |                | 10 |
|       | រ       | រ រ     | រ រ          | ឆ ឆ     | ឆ ឆ     | រ រ     | រ រ       | រ រ         | រ រ            | រ  |
|       | - - រ   | - រ - រ | - រ រ        | - ឆ - ឆ | - រ - រ | - រ -   | រ រ រ     | ឆ ឆ - រ     |                | 11 |
|       | រ       | រ       | រ រ          | ឆ ឆ     | រ រ     | រ រ     | រ រ       | ឆ ឆ         | រ រ            | រ  |

|      |         |         |         |         |         |         |         |         |         |    |
|------|---------|---------|---------|---------|---------|---------|---------|---------|---------|----|
| 4.1  | - ဖ ဖ   | ဖ မ     | - -     | - ဝ - မ | - ဟ - ဝ | - ဇ - မ | မဝ      | ဝမ      | - ဇ - ဝ | 12 |
|      | ဝ       | ဝ ဟ     | ဝ ဟ     | ဝ ဟ     | ဟ ဝ     | ဇ ဟ     | ဟ ဟ     | ဟ ဟ     | ဇ ဝ     |    |
| 4.2  | - ဟ - မ | - ဝ -   | *ဟ ဟ ဟ  | ဝ ဝ ဇ   | - ဝ - ဇ | - ဝ - ဟ | - ဝ -   | ဟ ဟ - ဝ | 13      |    |
|      | ဟ မ     | ဝ ဟ     | ဝ       | ဇ       | ဝ ဇ     | ဝ ဟ     | ဝ ဟ     | ဝ       |         |    |
| 4.3  | - - မဝ  | - မ - မ | - မဝ    | - ဇ - ဝ | - ဟ - ဝ | - ဟ -   | *ဝ ဝ ဝ  | ဇ ဇ - မ | 14      |    |
|      | ဟ       | ဟ       | ဟ ဟ     | ဇ ဝ     | ဟ ဝ     | ဟ ဝ     | ဇ       | ဟ       |         |    |
| 4.4  | - ဇ - မ | - - ဇ   | - ဇ - ဝ | - ဇ ဇ   | - မဝ    | - ဇ - ဝ | - ဇ - ဖ | - မ - ဝ | 15      |    |
|      | ဇ ဟ     | ဇ       | ဇ ဝ     | ဇ       | ဟ ဟ     | ဇ ဝ     | ဇ ဝ     | ဟ ဝ     |         |    |
| 4.5  | - ဝ ဝ   | - ဟ - ဇ | - ဝ - ဟ | - ဝ - ဝ | - ဝ - မ | - ဝ -   | *ဟ ဟ ဟ  | ဝ ဝ -   | 16      |    |
|      | ဝ       | ဟ ဇ     | ဝ ဟ     | ဝ ဝ     | ဝ မ     | ဝ ဟ     | ဝ       | ဇ       |         |    |
| 4.6  | - ဇ - မ | - ဝ -   | *ဇ ဇ ဇ  | ဝ ဝ ဟ   | - ဝ - မ | - ဝ -   | *ဟ ဟ ဟ  | ဝ ဝ ဇ   | 17      |    |
|      | ဟ       | ဝ ဇ     | ဝ       | ဟ       | ဝ မ     | ဝ ဟ     | ဝ       | ဇ       |         |    |
| 4.7  | - မဝ    | ဝ ဟ ဝ   | မဝ      | ဖ မ     | မဝ      | ဖ မ     |         | - ဝ - မ | 18      |    |
|      | ဝ ဝ     | မ ဝ     | ဝ ဝ     | ဝ ဟ     | ဝ မ     | ဝ ဟ     | - ဝ - ဟ | ဝ ဟ     |         |    |
| 4.8  | - - ဖမ  | - မ -   | - ဝ - ဝ | - - ဇ   | - ဝ - ဟ | - ဝ -   | *ဇ ဇ ဇ  | ဝ ဝ ဟ   | 19      |    |
|      | ဝ       | ဝ       | ဝ       | ဇ       | ဝ ဟ     | ဝ ဇ     | ဝ       | ဟ       |         |    |
| 4.9  | ဟ ဝ     | မဝ      | - ဝ - မ | - မ - မ | - ဝ - ဟ | - ဟ - မ | - ဝ -   | *ဟ ဟ ဟ  | ဝ ဝ -   | 20 |
|      | ဇ ဇ     | ဝ မ     | ဇ မ     | ဝ ဟ     | ဟ မ     | ဝ ဟ     | ဝ       | ဇ       | ဇ       |    |
| 4.10 | - ဇ - ဇ | - ဇ ဇ   | - ဝ - ဇ | - ဝ ဝ   | - ဇ - ဝ | - ဟ - ဝ | - ဝ - ဝ | - ဟ - ဝ | 21      |    |
|      | ဝ       | ဇ       | ဝ ဇ     | ဝ       | ဇ ဝ     | ဟ ဝ     | ဝ ဝ     | ဟ ဝ     |         |    |
| 4.11 | - - ဝ   | - မ ဖ   | ဝ ဟ ဝ   | ဝ ဝ ဝ   | - - ဖ မ | ဝ မ ဝ   | - ဝ - မ | မဝ -    | 22      |    |
|      | ဝ       | ဝ       | ဟ       | မ ဝ     |         | ဟ ဝ     | ဝ ဟ     | ဝ       | ဇ       |    |
| 4.12 | - ဇ -   | *ဝ ဝ ဝ  | - ဟ - ဝ | - ဇ - မ | - မ ဝ   | - မဝ    | - ဝ -   | - ဇ -   | 23      |    |
|      | ဝ       | ဝ       | ဟ ဝ     | ဇ ဝ     | ဇ ဟ     | ဟ ဟ     | ဝ ဇ     | ဇ       | ဝ       |    |



|       |         |         |       |         |       |       |         |
|-------|---------|---------|-------|---------|-------|-------|---------|
| - ឆ - | ៦ ក ក ក | - ក ក ក | - ឆ - | - ឡ - ឆ | - រ - | - ឡ - | ឆ ឆ - ក |
| ក     | ក       | ឆ រ ក   | ឆ ឡ   | ឡ ក     | ឆ ឡ   | ឡ ឆ   | ឆ ក     |

24

3.2

|   |   |   |   |   |   |   |   |   |   |   |   |   |   |   |   |      |   |   |   |   |   |   |   |   |   |   |
|---|---|---|---|---|---|---|---|---|---|---|---|---|---|---|---|------|---|---|---|---|---|---|---|---|---|---|
| - | n | - | a | a | - | n | - | a | - | n | - | r | - | m | - | (mn) | - | a | - | - | n | - | m | - | r | - |
| n | a |   | a |   | n |   | a |   | n |   | a |   | n |   | r | r    |   | m |   |   |   |   |   |   |   | n |

25

|   |   |    |   |   |   |   |   |   |   |   |   |   |   |   |   |   |   |   |    |
|---|---|----|---|---|---|---|---|---|---|---|---|---|---|---|---|---|---|---|----|
| - | n | nā | a | a | - | - | r | - | m | a | - | n | - | a | - | m | m | r | 26 |
|   |   | ṇ  |   | m |   | r | ṛ |   | r |   | ṛ | ṇ |   | ṛ | ṇ |   | ṇ |   |    |

|   |   |   |   |   |   |   |   |   |   |   |   |   |   |   |   |   |   |   |   |   |   |   |   |   |   |   |   |   |   |   |
|---|---|---|---|---|---|---|---|---|---|---|---|---|---|---|---|---|---|---|---|---|---|---|---|---|---|---|---|---|---|---|
| - | - | ด | - | ท | - | ช | - | ด | - | ท | - | ค | - | ว | - | ด | - | ท | - | ค | - | ว | - | ค | - | ท | - | ด | - | ท |
| ด | ด |   | ท | ช | ด | ท |   | ค | ว | ด | ท |   | ค | ว |   | ค | ท |   | ค | ท |   | ด | ค |   |   |   |   |   |   |   |

27

|     |       |         |          |         |         |       |           |      |   |
|-----|-------|---------|----------|---------|---------|-------|-----------|------|---|
| -   | မလှ   | - ခ - က | - ခံ - က | - ခ - လ | - ခ - က | - ခ - | *လှ လှ လှ | *မ မ | ရ |
| ရ ရ | ခု ဟု | ရ ဟု    | ခု ဟု    | ခု ဟု   | ခု ဟု   | ခု င  | ဟု        | ခု   |   |

28

4.2 

|   |    |   |    |   |   |   |    |   |   |   |    |    |   |   |    |   |    |   |   |   |   |    |
|---|----|---|----|---|---|---|----|---|---|---|----|----|---|---|----|---|----|---|---|---|---|----|
| - | nl | a | nl | m | - | - | -  | r | - | m | -  | nn | - | a | -  | - | nl | - | m | - | r | -  |
|   |    | m |    |   |   | r | nl |   | a |   | nl |    | a |   | nl |   | r  |   |   |   |   | nl |

 29

|   |   |   |   |   |   |   |   |   |    |    |    |    |    |    |    |    |    |    |    |    |    |    |    |    |    |    |    |    |    |
|---|---|---|---|---|---|---|---|---|----|----|----|----|----|----|----|----|----|----|----|----|----|----|----|----|----|----|----|----|----|
| ၁ | ၂ | ၃ | ၄ | ၅ | ၆ | ၇ | ၈ | ၉ | ၁၀ | ၁၁ | ၁၂ | ၁၃ | ၁၄ | ၁၅ | ၁၆ | ၁၇ | ၁၈ | ၁၉ | ၂၀ | ၂၁ | ၂၂ | ၂၃ | ၂၄ | ၂၅ | ၂၆ | ၂၇ | ၂၈ | ၂၉ | ၃၀ |
| ၁ | ၂ | ၃ | ၄ | ၅ | ၆ | ၇ | ၈ | ၉ | ၁၀ | ၁၁ | ၁၂ | ၁၃ | ၁၄ | ၁၅ | ၁၆ | ၁၇ | ၁၈ | ၁၉ | ၂၀ | ၂၁ | ၂၂ | ၂၃ | ၂၄ | ၂၅ | ၂၆ | ၂၇ | ၂၈ | ၂၉ | ၃၀ |

|   |   |    |   |    |    |    |   |   |   |   |   |   |   |    |    |   |    |   |    |    |    |   |    |   |   |   |   |
|---|---|----|---|----|----|----|---|---|---|---|---|---|---|----|----|---|----|---|----|----|----|---|----|---|---|---|---|
| - | - | မိ | - | ဘီ | -  | *က | က | က | - | ဇ | ဇ | ဗ | - | တံ | တံ | - | ဘီ | - | မိ | -  | ဘီ | - | တံ | - | က | - | ဇ |
|   | မ | မ  |   | ဘီ | ဟု |    |   |   |   | ဇ |   | ဗ |   | တ  |    |   | ဘီ | မ |    | ဘီ | တ  |   | ဟု |   | ဇ |   |   |

31

|   |   |   |   |   |   |   |   |   |   |   |   |   |   |   |   |    |   |   |   |   |   |   |   |   |   |   |   |   |   |   |       |
|---|---|---|---|---|---|---|---|---|---|---|---|---|---|---|---|----|---|---|---|---|---|---|---|---|---|---|---|---|---|---|-------|
| - | - | - | ၇ | - | - | - | မ | - | - | - | - | စ | - | ဇ | - | မိ | ၇ | က | - | ဇ | - | ဖ | - | - | - | မ | မ | ၇ | - | ၇ | // 32 |
|   |   |   | ဇ |   |   |   | က |   |   |   | စ |   |   | မ | ၇ | က  | ၇ |   |   |   | ဇ |   |   |   | က |   |   | မ | ၇ |   |       |

## Rhyme structure

Wat Reach Bo Pinpeat ensemble (KW) : Rhyming Structure: Section A [Phrase (P) 0-16]

A - 0: Introduction (P0)

d<sup>4</sup> e d e d e g<sup>8</sup> a<sup>8</sup> d<sup>8</sup> e<sup>8</sup> d<sup>8</sup> b<sup>8</sup> a<sup>8</sup> g<sup>8</sup> - d<sup>4</sup>

A - 1: Opening Phrase (P1) + Theme I (P2 - 4)

- b<sup>8</sup> a<sup>8</sup> d<sup>4</sup> d e e f<sup>4</sup> a<sup>8</sup> b<sup>8</sup> a<sup>8</sup> f f e e d<sup>4</sup> f e d b a b d<sup>4</sup> e<sup>4</sup> b<sup>8</sup> a<sup>8</sup> g<sup>8</sup> e<sup>4</sup> d e g<sup>8</sup> A<sup>8</sup>  
 b<sup>8</sup> e<sup>8</sup> d<sup>8</sup> b b a a g d<sup>4</sup> g<sup>8</sup> a<sup>8</sup> b<sup>8</sup> a<sup>8</sup> b b A<sup>8</sup> - b e e d e g<sup>8</sup> a<sup>8</sup> b<sup>8</sup> d<sup>8</sup> b<sup>8</sup> a a g g E<sup>4</sup>

A - 2: Theme II (P5 - 7)

b<sup>8</sup> a<sup>8</sup> b b a<sup>8</sup> b b b a b d<sup>8</sup> e<sup>8</sup> d<sup>8</sup> c<sup>8</sup> b<sup>8</sup> A<sup>8</sup> b<sup>8</sup> d<sup>8</sup> b<sup>8</sup> a a g g e<sup>4</sup> d b d e a<sup>8</sup> g g A<sup>8</sup>  
 a e<sup>4</sup> d<sup>4</sup> g g a a b d<sup>8</sup> e<sup>8</sup> d<sup>8</sup> b b a a G

A - 3: Theme III (P8 - 11)

c f<sup>4</sup> e<sup>4</sup> d<sup>4</sup> b d<sup>4</sup> e<sup>4</sup> g<sup>8</sup> d<sup>8</sup> b<sup>8</sup> a<sup>8</sup> g g a a B<sup>8</sup> b<sup>8</sup> a a b<sup>8</sup> a b d<sup>4</sup> e<sup>4</sup> e f a e f e d b  
 b<sup>8</sup> e<sup>8</sup> d<sup>8</sup> b b a a g d<sup>4</sup> g<sup>8</sup> a<sup>8</sup> b<sup>8</sup> a<sup>8</sup> b b A<sup>8</sup> - b e e d e g<sup>8</sup> a<sup>8</sup> b<sup>8</sup> d<sup>8</sup> b<sup>8</sup> a a g g E<sup>4</sup>

A - 4: Theme I [Repetition] (P12 - 14)

f e d b a b d<sup>4</sup> e<sup>4</sup> b<sup>8</sup> a<sup>8</sup> g<sup>8</sup> e<sup>4</sup> d e g<sup>8</sup> A<sup>8</sup> b<sup>8</sup> e<sup>8</sup> d<sup>8</sup> b b a a g d<sup>4</sup> g<sup>8</sup> a<sup>8</sup> b<sup>8</sup> a<sup>8</sup> b b A<sup>8</sup>  
 - b e e d e g<sup>8</sup> a<sup>8</sup> b<sup>8</sup> d<sup>8</sup> b<sup>8</sup> a a g g E<sup>4</sup>

A - 5: Ending of section A or Introduction of section B (P15 - 16)

g<sup>8</sup> e<sup>4</sup> g g g<sup>8</sup> a<sup>8</sup> g g d e g<sup>8</sup> a<sup>8</sup> g<sup>8</sup> f<sup>4</sup> e<sup>4</sup> d<sup>4</sup> a a b<sup>8</sup> g<sup>8</sup> a<sup>8</sup> b<sup>8</sup> c<sup>8</sup> d<sup>8</sup> e<sup>8</sup> d<sup>8</sup> b b a a G

Wat Reach Bo Pinpeat ensemble (KW) : Rhyming Structure: Section B [Phrase 17-32]

B - 1: Transition I (P17 - 18)

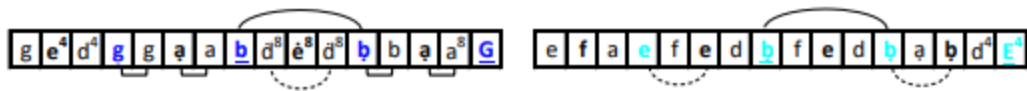

B - 2: Theme VI (P19 - 22)

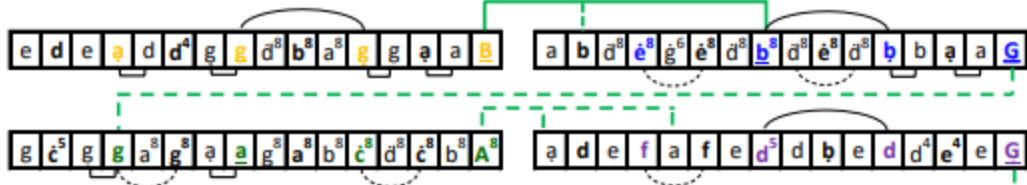

B - 3: Transition II (P23 - 24)

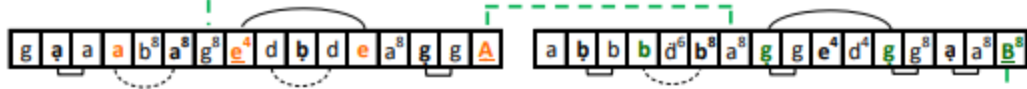

B - 4: Theme V (P25 - 28)

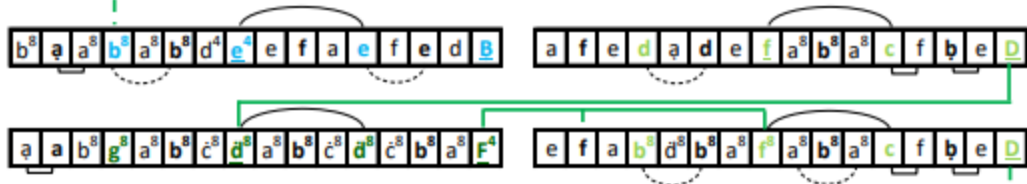

B - 5: Ending of section B [Final Phrase] (P29 - 32)

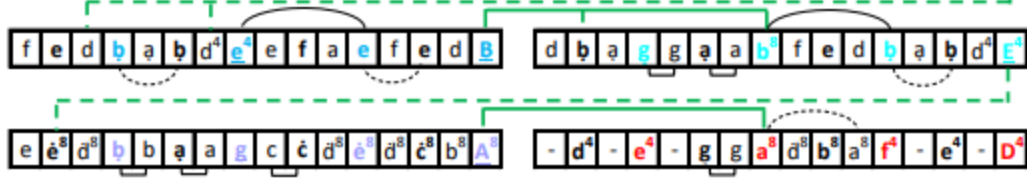

Supplement: s1 [file s1]
