# Supplementary material
Source: MDPI journal article supplement (https://www.mdpi.com/2306-5729/9/4/50)
Supplement: s1 [file s1]

## **Supplementary Materials**

**Title: DNA of Music: Identifying relationships among different versions of the composition Sadhukarn from Thailand, Laos and Cambodia using multivariate statistics**

**Sumetus Eambangyung <sup>1,\*</sup>, Gretel Schwörer-Kohl<sup>1</sup> and Witoon Purahong<sup>2</sup>**

<sup>1</sup> Institut für Musik, Medien- und Sprechwissenschaften (IMMS) Abteilung Musikwissenschaft, Martin—Luther—Universität Halle—Wittenberg, 06099 Halle (Saale), Germany;  
sumetus.eambangyung@student.uni-halle.de (S.E.); gretel.schwoerer@musikwiss.uni-halle.de (G.S.-K)

<sup>2</sup> Department of Soil Ecology, UFZ-Helmholtz Centre for Environmental Research, D-06120 Halle (Saale), Germany; witoon.purahong@ufz.de (W.P.)

\* Correspondence: sumetus.eambangyung@student.uni-halle.de (S.E.)

**Appendix II: Degree of note and interval ratio in Khong Wong Yai.**

**Table S2** Degree of note and interval ratio in Khong Wong Yai.

| Degree | Name of notes and intervals         |                        | Type of intervals |
|--------|-------------------------------------|------------------------|-------------------|
|        | Romanized Notation                  | Thai notation          |                   |
| 1      | <b>D</b>                            | ริ                     | single            |
| 2      | D $\dot{\text{E}}$                  | ริม                    | 2                 |
| 3      | <b>E</b>                            | ม                      | single            |
| 4      | D $\dot{\text{F}}$                  | ริฟ                    | 3                 |
| 5      | E $\dot{\text{F}}$                  | มฟ                     | 2                 |
| 6      | <b>F</b>                            | ฟ                      | single            |
| 7      | D $\dot{\text{G}}$                  | ริช                    | 4                 |
| 8      | E $\dot{\text{G}}$                  | มช                     | 3                 |
| 9      | F $\dot{\text{G}}$                  | ฟช                     | 2                 |
| 10     | <b>G</b>                            | ช                      | single            |
| 11     | D $\dot{\text{A}}$                  | ริล                    | 5                 |
| 12     | E $\dot{\text{A}}$ ( $\text{A}^4$ ) | มล (ล <sup>4</sup> )   | 4                 |
| 13     | F $\dot{\text{A}}$                  | ฟล                     | 3                 |
| 14     | G $\dot{\text{A}}$                  | ชล                     | 2                 |
| 15     | <b>A</b>                            | ล                      | single            |
| 16     | D $\dot{\text{B}}$                  | ริน                    | 6                 |
| 17     | E $\dot{\text{B}}$                  | มม                     | 5                 |
| 18     | F $\dot{\text{B}}$ ( $\text{B}^4$ ) | ฟม (ม <sup>4</sup> )   | 4                 |
| 19     | G $\dot{\text{B}}$                  | ชม                     | 3                 |
| 20     | A $\dot{\text{B}}$                  | ลม                     | 2                 |
| 21     | <b>B</b>                            | ม                      | single            |
| 22     | D $\dot{\text{C}}$                  | รินค                   | 7                 |
| 23     | E $\dot{\text{C}}$ ( $\text{E}^6$ ) | มค (ม <sup>6</sup> )   | 6                 |
| 24     | F $\dot{\text{C}}$ ( $\text{F}^5$ ) | ฟค (ฟ <sup>5</sup> )   | 5                 |
| 25     | G $\dot{\text{C}}$ ( $\text{C}^4$ ) | ชค (ช <sup>4</sup> )   | 4                 |
| 26     | A $\dot{\text{C}}$ ( $\text{A}^3$ ) | ลค (ล <sup>3</sup> )   | 3                 |
| 27     | B $\dot{\text{C}}$ ( $\text{B}^2$ ) | มค (ม <sup>2</sup> )   | 2                 |
| 28     | <b>C</b>                            | ค                      | single            |
| 29     | D $\dot{\text{D}}$ ( $\text{D}^8$ ) | รินร (ร <sup>8</sup> ) | 8                 |
| 30     | E $\dot{\text{D}}$                  | มร                     | 7                 |
| 31     | F $\dot{\text{D}}$                  | ฟร                     | 6                 |
| 32     | G $\dot{\text{D}}$ ( $\text{G}^5$ ) | ชร (ช <sup>5</sup> )   | 5                 |
| 33     | A $\dot{\text{D}}$ ( $\text{D}^4$ ) | ลร (ร <sup>4</sup> )   | 4                 |
| 34     | B $\dot{\text{D}}$ ( $\text{B}^3$ ) | มร (ม <sup>3</sup> )   | 3                 |
| 35     | CD                                  | คร                     | 2                 |
| 36     | <b>D</b>                            | ริ                     | single            |

| Degree | Name of notes and intervals           |                                      | Type of intervals |
|--------|---------------------------------------|--------------------------------------|-------------------|
|        | Romanized Notation                    | Thai notation                        |                   |
| 37     | ḌE                                   | ดิม                                  | 9                 |
| 38     | ẸE (E <sup>8</sup> )                 | มม (ม <sup>8</sup> )                 | 8                 |
| 39     | F̣E                                   | ฟิม                                  | 7                 |
| 40     | G̣E                                   | ชม                                   | 6                 |
| 41     | ẠE                                   | ถม                                   | 5                 |
| 42     | ḄE (E <sup>4</sup> )                 | ทม (ม <sup>4</sup> )                 | 4                 |
| 43     | C̣E (C <sup>3</sup> )                 | คม (ค <sup>3</sup> )                 | 3                 |
| 44     | ḌE (D <sup>2</sup> /E <sup>2</sup> ) | รม (ร <sup>2</sup> /ม <sup>2</sup> ) | 2                 |
| 45     | E                                     | ม                                    | single            |
| 46     | ḌF                                   | ดฟ                                   | 10                |
| 47     | ẸF                                   | มฟ                                   | 9                 |
| 48     | F̣F (F <sup>8</sup> )                 | ฟฟ (ฟ <sup>8</sup> )                 | 8                 |
| 49     | G̣F                                   | ชฟ                                   | 7                 |
| 50     | ẠF (A <sup>6</sup> )                 | ถฟ (ถ <sup>6</sup> )                 | 6                 |
| 51     | ḄF                                   | ทฟ                                   | 5                 |
| 52     | C̣F (F <sup>4</sup> )                 | คฟ (ฟ <sup>4</sup> )                 | 4                 |
| 53     | ḌF (D <sup>3</sup> )                 | รฟ (ร <sup>3</sup> )                 | 3                 |
| 54     | ẸF                                   | มฟ                                   | 2                 |
| 55     | F                                     | ฟ                                    | single            |
| 56     | ḌG                                   | ดช                                   | 11                |
| 57     | ẸG                                   | มช                                   | 10                |
| 58     | F̣G                                   | ฟช                                   | 9                 |
| 59     | G̣G (G <sup>8</sup> )                 | ชช (ช <sup>8</sup> )                 | 8                 |
| 60     | ẠG                                   | ถช                                   | 7                 |
| 61     | ḄG                                   | ทช                                   | 6                 |
| 62     | C̣G (G <sup>5</sup> )                 | คช (ค <sup>5</sup> )                 | 5                 |
| 63     | ḌG (G <sup>4</sup> )                 | รช (ช <sup>4</sup> )                 | 4                 |
| 64     | ẸG (E <sup>3</sup> )                 | มช (ม <sup>3</sup> )                 | 3                 |
| 65     | F̣G (F <sup>2</sup> )                 | ฟช (ฟ <sup>2</sup> )                 | 2                 |
| 66     | G                                     | ช                                    | single            |
| 67     | ḌA                                   | ดถ                                   | 12                |
| 68     | ẸA                                   | มถ                                   | 11                |
| 69     | F̣A                                   | ฟถ                                   | 10                |
| 70     | G̣A                                   | ชถ                                   | 9                 |
| 71     | ẠA (A <sup>8</sup> )                 | ถถ (ถ <sup>8</sup> )                 | 8                 |
| 72     | ḄA                                   | ทถ                                   | 7                 |
| 73     | C̣A                                   | คถ                                   | 6                 |
| 74     | ḌA (A <sup>5</sup> /D <sup>5</sup> ) | รถ (ถ <sup>5</sup> /ร <sup>5</sup> ) | 5                 |

| Degree | Name of notes and intervals |                       | Type of intervals |
|--------|-----------------------------|-----------------------|-------------------|
|        | Romanized Notation          | Thai notation         |                   |
| 75     | EA (A <sup>4</sup> )        | มถ (ถ <sup>4</sup> )  | 4                 |
| 76     | FA (F <sup>3</sup> )        | ฟถ (ฟ <sup>3</sup> )  | 3                 |
| 77     | GA                          | ชถ                    | 2                 |
| 78     | A                           | ถ                     | single            |
| 79     | DB                          | รท                    | 13                |
| 80     | EB                          | มท                    | 12                |
| 81     | FB                          | ฟท                    | 11                |
| 82     | GB                          | ชท                    | 10                |
| 83     | AB                          | คท                    | 9                 |
| 84     | BB (B <sup>8</sup> )        | ทุท (ท <sup>8</sup> ) | 8                 |
| 85     | CB                          | ดท                    | 7                 |
| 86     | DB (D <sup>6</sup> )        | รท (ร <sup>6</sup> )  | 6                 |
| 87     | EB (E <sup>5</sup> )        | มท (ม <sup>5</sup> )  | 5                 |
| 88     | FB (F <sup>4</sup> )        | ฟท (ฟ <sup>4</sup> )  | 4                 |
| 89     | GB (G <sup>3</sup> )        | ชท (ช <sup>3</sup> )  | 3                 |
| 90     | AB (A <sup>2</sup> )        | คท (ค <sup>2</sup> )  | 2                 |
| 91     | B                           | ท                     | single            |
| 92     | D <sup>ˆ</sup> C            | รค <sup>ˆ</sup>       | 14                |
| 93     | E <sup>ˆ</sup> C            | มค <sup>ˆ</sup>       | 13                |
| 94     | F <sup>ˆ</sup> C            | ฟค <sup>ˆ</sup>       | 12                |
| 95     | G <sup>ˆ</sup> C            | ชค <sup>ˆ</sup>       | 11                |
| 96     | A <sup>ˆ</sup> C            | คค <sup>ˆ</sup>       | 10                |
| 97     | B <sup>ˆ</sup> C            | ทค <sup>ˆ</sup>       | 9                 |
| 98     | CC (C <sup>8</sup> )        | คค (ค <sup>8</sup> )  | 8                 |
| 99     | D <sup>ˆ</sup> C            | รค <sup>ˆ</sup>       | 7                 |
| 100    | E <sup>ˆ</sup> C            | มค <sup>ˆ</sup>       | 6                 |
| 101    | F <sup>ˆ</sup> C            | ฟค <sup>ˆ</sup>       | 5                 |
| 102    | G <sup>ˆ</sup> C            | ชค <sup>ˆ</sup>       | 4                 |
| 103    | A <sup>ˆ</sup> C            | คค <sup>ˆ</sup>       | 3                 |
| 104    | B <sup>ˆ</sup> C            | ทค <sup>ˆ</sup>       | 2                 |
| 105    | C <sup>ˆ</sup>              | ค <sup>ˆ</sup>        | single            |
| 106    | D <sup>ˆ</sup> D            | รร <sup>ˆ</sup>       | 15                |
| 107    | E <sup>ˆ</sup> D            | มร <sup>ˆ</sup>       | 14                |
| 108    | F <sup>ˆ</sup> D            | ฟร <sup>ˆ</sup>       | 13                |
| 109    | G <sup>ˆ</sup> D            | ชร <sup>ˆ</sup>       | 12                |
| 110    | A <sup>ˆ</sup> D            | คร <sup>ˆ</sup>       | 11                |
| 111    | B <sup>ˆ</sup> D            | ทร <sup>ˆ</sup>       | 10                |
| 112    | C <sup>ˆ</sup> D            | ดร <sup>ˆ</sup>       | 9                 |
| 113    | DD (D <sup>8</sup> )        | รร (ร <sup>8</sup> )  | 8                 |

| Degree | Name of notes and intervals   |                        | Type of intervals |
|--------|-------------------------------|------------------------|-------------------|
|        | Romanized Notation            | Thai notation          |                   |
| 114    | E $\dot{D}$                   | มริ                    | 7                 |
| 115    | F $\dot{D}$ (F <sup>6</sup> ) | ฟริ (ฟ <sup>6</sup> )  | 6                 |
| 116    | G $\dot{D}$                   | ขริ                    | 5                 |
| 117    | A $\dot{D}$                   | ถริ                    | 4                 |
| 118    | B $\dot{D}$                   | ทริ                    | 3                 |
| 119    | C $\dot{D}$                   | คริ                    | 2                 |
| 120    | $\dot{D}$                     | ริ                     | single            |
| 121    | D $\dot{E}$                   | รุมี                   | 16                |
| 122    | E $\dot{E}$                   | มูมี                   | 15                |
| 123    | F $\dot{E}$                   | ฟุมี                   | 14                |
| 124    | G $\dot{E}$                   | ขุมี                   | 13                |
| 125    | A $\dot{E}$                   | ลูมี                   | 12                |
| 126    | B $\dot{E}$                   | ทุมี                   | 11                |
| 127    | C $\dot{E}$                   | คมี                    | 10                |
| 128    | D $\dot{E}$                   | รมี                    | 9                 |
| 129    | E $\dot{E}$ (E <sup>8</sup> ) | มมมี (ม <sup>8</sup> ) | 8                 |
| 130    | F $\dot{E}$                   | ฟมี                    | 7                 |
| 131    | G $\dot{E}$ (G <sup>6</sup> ) | ขมี (ข <sup>6</sup> )  | 6                 |
| 132    | A $\dot{E}$ (A <sup>5</sup> ) | ลมี (ล <sup>5</sup> )  | 5                 |
| 133    | B $\dot{E}$                   | ทมี                    | 4                 |
| 134    | C $\dot{E}$ (C <sup>3</sup> ) | คมี (ค <sup>3</sup> )  | 3                 |
| 135    | D $\dot{E}$ (D <sup>2</sup> ) | รมี (ร <sup>2</sup> )  | 2                 |
| 136    | $\dot{E}$                     | มี                     | single            |
