# Supplementary material
Source: MDPI journal article supplement (https://www.mdpi.com/2306-5729/9/4/50)
Supplement: s1 [file s1]

## **Supplementary Materials**

**Title: DNA of Music: Identifying relationships among different versions of the composition Sadhukarn from Thailand, Laos and Cambodia using multivariate statistics**

**Sumetus Eambangyung <sup>1,\*</sup>, Gretel Schwörer-Kohl<sup>1</sup> and Witoon Purahong<sup>2</sup>**

<sup>1</sup> Institut für Musik, Medien- und Sprechwissenschaften (IMMS) Abteilung Musikwissenschaft, Martin—Luther—Universität Halle—Wittenberg, 06099 Halle (Saale), Germany;  
sumetus.eambangyung@student.uni-halle.de (S.E.); gretel.schwoerer@musikwiss.uni-halle.de (G.S.-K)

<sup>2</sup> Department of Soil Ecology, UFZ-Helmholtz Centre for Environmental Research, D-06120 Halle (Saale), Germany; witoon.purahong@ufz.de (W.P.)

\* Correspondence: sumetus.eambangyung@student.uni-halle.de (S.E.)

**Appendix III:** Average degree for each phrase of all six elemental music parameters.

**Figure S1.** Average degree for each phrase of rhyme structure

|     | 0   | 1   | 2   | 3   | 4   | 5   | 6   | 7   | 8   | 9   | 10  | 11  | 12  | 13  | 14  | 15  | 16  | 17  | 18  | 19  | 20  | 21  | 22  | 23  | 24  | 25  | 26  | 27  | 28  | 29  | 30  | 31  | 32  |
|-----|-----|-----|-----|-----|-----|-----|-----|-----|-----|-----|-----|-----|-----|-----|-----|-----|-----|-----|-----|-----|-----|-----|-----|-----|-----|-----|-----|-----|-----|-----|-----|-----|-----|
| TF  | 2.5 | 2.6 | 3.4 | 2.6 | 3.6 | 3.4 | 3.3 | 3   | 2.8 | 3.1 | 2.6 | 3.3 | 3.3 | 3   | 2.8 | 4.3 | 2.2 | 2.6 | 3.5 | 2.8 | 2.7 | 3.3 | 2.4 | 3.6 | 2.8 | 1.9 | 2.6 | 3.3 | 3.1 | 4   | 3.9 | 2.7 | 2.4 |
| TB  | 2.8 | 2.7 | 3.4 | 3.9 | 3.6 | 2.9 | 3   | 3.2 | 2.6 | 3.1 | 3.8 | 3.3 | 3.3 | 4.3 | 3.5 | 3.4 | 4.6 | 3.1 | 2.9 | 2.6 | 2.7 | 3.5 | 2.5 | 3   | 2.8 | 1.9 | 2.7 | 3.3 | 3.1 | 2.4 | 3.9 | 4.1 | 3.2 |
| TS1 | 2.8 | 2.6 | 3.4 | 2.3 | 2.7 | 3.1 | 2.8 | 2.8 | 2.5 | 3.6 | 2.6 | 2.4 | 3.2 | 2.6 | 2.6 | 3.8 | 2.4 | 2.7 | 2.9 | 2.4 | 2.7 | 3.8 | 2.6 | 2.7 | 3   | 1.5 | 2.9 | 5.1 | 3.2 | 3.1 | 3.4 | 2.4 | 2.9 |
| TP1 | 2.4 | 2.7 | 3.4 | 3.9 | 3.1 | 3.6 | 2.9 | 2.9 | 3.1 | 3.1 | 3.8 | 2.7 | 3.3 | 4.3 | 2.9 | 3.6 | 4.1 | 2.7 | 2.9 | 2.9 | 2.7 | 4.3 | 2.6 | 3   | 2.8 | 1.9 | 2.7 | 5.1 | 2.7 | 4   | 3.6 | 3.9 | 2.3 |
| TK  | 2.4 | 2.7 | 3.6 | 3.9 | 3.2 | 3.6 | 2.9 | 2.9 | 3.1 | 3.5 | 3.8 | 2.8 | 3.1 | 4.3 | 3   | 3.1 | 4.1 | 2.7 | 2.8 | 2.9 | 2.7 | 4.3 | 2.6 | 3   | 3.7 | 1.9 | 2.6 | 3.3 | 3.1 | 2.4 | 3.7 | 3.9 | 2.4 |
| TC  | 2.8 | 2.7 | 3.4 | 3.5 | 3.4 | 4.3 | 3   | 3.3 | 2.6 | 3.1 | 3.4 | 3   | 3.3 | 3.9 | 3.3 | 3.8 | 3   | 3.1 | 2.9 | 2.7 | 2.7 | 3.8 | 2.8 | 3   | 2.8 | 1.9 | 2.6 | 3   | 3.2 | 2.4 | 3.9 | 3.7 | 2.8 |
| TD  | 2.4 | 2.7 | 3.8 | 3.9 | 3.2 | 2.9 | 2.8 | 2.8 | 2.8 | 3.1 | 3.8 | 2.8 | 3.4 | 4.3 | 2.9 | 3.6 | 2.6 | 2.8 | 2.9 | 3.4 | 2.7 | 3.9 | 2.5 | 2.6 | 2.8 | 1.9 | 2.7 | 5.1 | 3.1 | 4   | 3.8 | 3.9 | 2.4 |
| TP  | 2.4 | 2.6 | 3.1 | 3.9 | 3.8 | 3.1 | 2.8 | 2.8 | 2.8 | 3.1 | 3.8 | 2.9 | 2.7 | 4.3 | 3.1 | 4.3 | 4.2 | 2.8 | 2.9 | 2.8 | 2.7 | 3.4 | 2.5 | 3   | 3.7 | 1.5 | 2.9 | 3.8 | 3.1 | 2.4 | 3.6 | 3.9 | 2.6 |
| TT  | 2.4 | 2.6 | 3   | 2.3 | 3.2 | 2.8 | 2.8 | 2.8 | 3.1 | 3.5 | 2.2 | 2.8 | 3.1 | 2.6 | 3   | 4.3 | 3.3 | 2.6 | 2.9 | 2.6 | 2.7 | 4.6 | 2.8 | 3.3 | 4.3 | 1.9 | 2.9 | 5.1 | 3.1 | 3.3 | 3.8 | 2.7 | 2.4 |
| TP2 | 2.4 | 3.3 | 3.6 | 3.9 | 3.2 | 3.6 | 2.9 | 2.9 | 3.1 | 3.5 | 3.8 | 2.8 | 3.1 | 4.3 | 3   | 3.1 | 4.1 | 2.8 | 2.8 | 2.9 | 2.7 | 4.2 | 2.6 | 3   | 3.7 | 1.9 | 2.6 | 3.3 | 3.1 | 2.5 | 3.7 | 3.9 | 2.4 |
| TR  | 2.4 | 2.6 | 3.1 | 2.4 | 3.4 | 4.2 | 2.8 | 2.8 | 2.5 | 3.1 | 2.4 | 3.4 | 3.1 | 2.8 | 3.6 | 4.3 | 3.3 | 2.6 | 2.9 | 2.4 | 2.7 | 3.3 | 2.8 | 3.1 | 3.9 | 1.9 | 2.6 | 3.9 | 2.9 | 3.4 | 2.9 | 2.6 | 3.1 |
| TN  | 2.4 | 3   | 2.9 | 3.9 | 3.1 | 3.5 | 2.8 | 3.8 | 3.1 | 3.1 | 3.8 | 2.7 | 3.1 | 4.3 | 2.9 | 3.4 | 4.4 | 2.8 | 3.4 | 2.7 | 2.7 | 3.4 | 2.6 | 2.7 | 3.9 | 1.8 | 2.8 | 2.6 | 3.1 | 2.4 | 4.2 | 3.9 | 2.5 |
| TW  | 2.8 | 2.6 | 3.4 | 3.9 | 3.7 | 2.9 | 3.3 | 3.3 | 2.6 | 3.1 | 3.8 | 3.3 | 3.3 | 4.3 | 3.5 | 3.4 | 4.6 | 3   | 2.9 | 2.6 | 2.7 | 3.5 | 2.5 | 3   | 2.8 | 1.9 | 2.6 | 3.3 | 3.1 | 2.4 | 3.9 | 4.1 | 3.1 |
| TS2 | 2.8 | 2.6 | 3.3 | 2.4 | 2.9 | 3.1 | 2.4 | 2.8 | 2.5 | 3.6 | 2.5 | 2.6 | 3.2 | 2.6 | 2.8 | 3.8 | 2.3 | 2.7 | 2.9 | 2.4 | 2.7 | 3.9 | 2.6 | 2.7 | 3   | 1.5 | 2.9 | 5.1 | 3.2 | 3   | 3.4 | 2.6 | 3.1 |
| TJ  | 2.4 | 3.3 | 2.8 | 3.9 | 3.8 | 3.6 | 2.8 | 2.8 | 3.1 | 3.1 | 3.8 | 3.4 | 2.6 | 4.3 | 3.6 | 4.3 | 4.6 | 2.7 | 2.8 | 2.4 | 2.7 | 4.3 | 2.6 | 3.1 | 2.8 | 1.8 | 3   | 3.6 | 3   | 3.6 | 4.2 | 4.1 | 3.1 |
| TTD | 1.8 | 1.8 | 1.5 | 1.4 | 1.8 | 1.6 | 1.8 | 1.8 | 1.3 | 2.1 | 1.4 | 1.6 | 1.3 | 1.6 | 1.8 | 1.9 | 1.4 | 1.6 | 1.6 | 1.3 | 1.1 | 2.2 | 1.6 | 2.1 | 2.6 | 2.3 | 1.6 | 1.1 | 1.4 | 2.4 | 2.1 | 1.4 | 1.9 |
| KS1 | 2.9 | 2.7 | 3.1 | 3.5 | 2.6 | 0   | 0   | 0   | 0   | 0   | 0   | 0   | 0   | 0   | 0   | 0   | 0   | 0   | 0   | 0   | 0   | 0   | 0   | 0   | 0   | 0   | 0   | 0   | 0   | 0   | 0   | 0   | 0   |
| KS2 | 3.1 | 3.2 | 3.1 | 3.4 | 3.3 | 2.9 | 2.5 | 2.7 | 2.6 | 2.5 | 3.4 | 2.9 | 4.4 | 1.8 | 3.5 | 3.1 | 4.4 | 3.8 | 3.5 | 0   | 0   | 0   | 0   | 0   | 0   | 0   | 0   | 0   | 0   | 0   | 0   | 0   | 0   |
| KR  | 1.7 | 3.9 | 2.9 | 2.6 | 3.9 | 3.9 | 2.7 | 2.8 | 2.6 | 2.8 | 2.6 | 3   | 2.5 | 3   | 3.3 | 3.9 | 3.8 | 2.4 | 2.8 | 2.2 | 2.4 | 3.5 | 2.9 | 2.9 | 3.6 | 3.1 | 3.1 | 3.6 | 2.9 | 3.1 | 4.4 | 3.8 | 3.7 |
| KWR | 3.6 | 2.6 | 3.6 | 2.4 | 3.3 | 4.1 | 2.9 | 3.1 | 3.6 | 2.3 | 2.4 | 2.9 | 3.1 | 2.8 | 3.1 | 3.9 | 4.6 | 2.9 | 3.5 | 2.6 | 2.4 | 4.2 | 2.9 | 3.1 | 4.4 | 2.9 | 3.1 | 5.6 | 3.1 | 2.9 | 2.7 | 3.8 | 2.6 |
| IP  | 2.7 | 2.7 | 4.8 | 3.3 | 3.1 | 2.7 | 3.2 | 3.1 | 3.1 | 2.8 | 3.2 | 2.8 | 3.9 | 3.6 | 3.1 | 3.4 | 5.1 | 3.1 | 3.5 | 2.7 | 2.4 | 3.6 | 2.6 | 3.5 | 3.3 | 2.9 | 3.4 | 2.8 | 3.5 | 2.9 | 2.9 | 3.3 | 3.3 |
| IN  | 3.5 | 4.1 | 4.9 | 3.6 | 3.8 | 2.4 | 2.6 | 3   | 2.4 | 2.3 | 3.2 | 2.9 | 3.6 | 4.2 | 3.3 | 3.2 | 5.1 | 2.8 | 2.8 | 2.4 | 2.6 | 3.8 | 2.8 | 3.3 | 3.5 | 3.3 | 3.2 | 3.3 | 3.7 | 0.8 | 3.8 | 3.6 | 3.5 |
| LB1 | 1.5 | 2   | 2.4 | 2.4 | 2.3 | 2.8 | 1.9 | 1.8 | 2   | 1.9 | 2.3 | 1.8 | 2.1 | 2.8 | 2.1 | 2.6 | 2.7 | 1.5 | 1.9 | 1.8 | 1.6 | 2.1 | 1.8 | 2.1 | 2.5 | 2   | 1.6 | 4.3 | 1.9 | 1.9 | 1.9 | 2.6 | 2.1 |
| LB2 | 1.5 | 2   | 2.4 | 2.4 | 2.3 | 2.8 | 1.9 | 1.8 | 2   | 1.9 | 2.3 | 1.8 | 2.1 | 2.8 | 2.1 | 2.6 | 2.7 | 1.5 | 1.9 | 1.8 | 1.6 | 2.1 | 1.8 | 2.1 | 2.5 | 2   | 1.6 | 4.3 | 1.9 | 1.9 | 1.9 | 2.3 | 3.4 |
| LB3 | 2.9 | 3.2 | 3.8 | 3.9 | 3.8 | 4.1 | 3.7 | 3.1 | 3.3 | 3.2 | 3.9 | 3.4 | 3.5 | 4.3 | 3.6 | 4.3 | 4.1 | 2.9 | 3.2 | 3.1 | 2.4 | 3.8 | 3.1 | 3.5 | 3.9 | 3.3 | 2.9 | 5.6 | 3.8 | 2.7 | 4.2 | 4   | 3.4 |
| LY  | 3.7 | 3.9 | 3   | 3.9 | 3.7 | 3.8 | 3.2 | 2.9 | 3   | 2.8 | 3.8 | 3.3 | 2.8 | 4.3 | 3.5 | 3.7 | 4.7 | 3.7 | 3.5 | 3.4 | 2.9 | 3.7 | 2.4 | 3.3 | 3.6 | 2.9 | 3.9 | 4.4 | 0   | 0   | 0   | 4   | 3.6 |

**Figure S2.** Average degree for each phrase of Look Tok (pillar tone)

|     | 0   | 1   | 2   | 3   | 4   | 5   | 6   | 7   | 8   | 9   | 10  | 11  | 12  | 13  | 14  | 15  | 16  | 17  | 18  | 19  | 20  | 21  | 22  | 23  | 24  | 25  | 26  | 27  | 28  | 29  | 30  | 31  | 32  |
|-----|-----|-----|-----|-----|-----|-----|-----|-----|-----|-----|-----|-----|-----|-----|-----|-----|-----|-----|-----|-----|-----|-----|-----|-----|-----|-----|-----|-----|-----|-----|-----|-----|-----|
| TF  | 3.3 | 2.8 | 3   | 2   | 2.8 | 3   | 2.3 | 3.3 | 2.5 | 3   | 2   | 2   | 2.8 | 2.5 | 3   | 3.5 | 2.3 | 2.8 | 3.8 | 2.3 | 2.5 | 2.3 | 3.3 | 2.3 | 2.5 | 2.5 | 2.8 | 4.3 | 2.8 | 3.5 | 3.8 | 2.5 | 2.8 |
| TB  | 3.8 | 2.8 | 3   | 2.8 | 2.8 | 2.5 | 2.8 | 3.3 | 2.8 | 3   | 2.8 | 2   | 2.8 | 3.3 | 2.3 | 3.5 | 4   | 3   | 3.3 | 2.3 | 2.5 | 2.5 | 3.3 | 2.3 | 2.5 | 2.5 | 3.8 | 4.3 | 3   | 2.5 | 3.8 | 3   | 2.5 |
| TS1 | 3.8 | 2.8 | 3   | 2   | 3   | 3.8 | 2.8 | 2.5 | 2.5 | 3.5 | 2   | 2.3 | 2.8 | 2.5 | 2.5 | 3.3 | 2.8 | 2.8 | 3.3 | 2.5 | 2.5 | 3.8 | 3.3 | 3.3 | 3   | 2.5 | 2.5 | 4.8 | 3   | 1.8 | 3.5 | 2.5 | 3.3 |
| TP1 | 3.3 | 2.8 | 3   | 2.8 | 3.8 | 4   | 2.5 | 3   | 2.3 | 3   | 2.8 | 2.8 | 2.8 | 3.3 | 3   | 2.8 | 4.5 | 2.8 | 3.3 | 2.3 | 2.5 | 3.3 | 3.3 | 2.3 | 2.3 | 2.5 | 3.5 | 4.8 | 3   | 3.5 | 4   | 3.3 | 2.5 |
| TK  | 3.3 | 2.3 | 1.8 | 2.8 | 2.8 | 4   | 2.5 | 3   | 2.3 | 3.5 | 2.8 | 2   | 1.8 | 3.3 | 2.8 | 3.8 | 4.5 | 2.8 | 3.3 | 2.3 | 2.5 | 3.8 | 3.3 | 2.3 | 3.3 | 2.5 | 3.5 | 4.3 | 3   | 2.5 | 3.8 | 3.3 | 2.5 |
| TC  | 3.8 | 2.8 | 3   | 2.5 | 3.8 | 4   | 2.8 | 3.3 | 2.8 | 3   | 2.5 | 2   | 2.8 | 3.3 | 3   | 3.3 | 2.5 | 3   | 3.3 | 2.3 | 2.5 | 3   | 2.3 | 2.3 | 3.3 | 2.5 | 2.8 | 4.3 | 3   | 2.5 | 3.8 | 2.5 | 2.5 |
| TD  | 3.3 | 2.8 | 3   | 2.8 | 2.8 | 2.3 | 2.8 | 2.5 | 2.5 | 3   | 2.8 | 2   | 2.8 | 3.3 | 3   | 3.5 | 3.3 | 2.8 | 3.3 | 2.8 | 2.5 | 3   | 3.3 | 2.8 | 2.3 | 2.5 | 3.5 | 4.8 | 3   | 2.5 | 3.5 | 3.3 | 2.5 |
| TP  | 2.5 | 2.8 | 1.8 | 2.8 | 2.8 | 3.8 | 2.5 | 2.5 | 2.5 | 3   | 2.8 | 2.5 | 1.8 | 3.3 | 2.8 | 3.5 | 4   | 2.8 | 3.3 | 2.3 | 2.5 | 3.3 | 3.3 | 2.3 | 3.3 | 2.5 | 2.5 | 4.3 | 3   | 2.5 | 3.5 | 3.3 | 3   |
| TT  | 3.5 | 2.8 | 3   | 2   | 2.8 | 4   | 2.8 | 2.5 | 2.5 | 3   | 2   | 2   | 1.8 | 2.5 | 2.3 | 3.5 | 2.5 | 2.8 | 3.3 | 2.3 | 2.5 | 2   | 2.3 | 2.8 | 4.3 | 2.5 | 3.5 | 4.8 | 2.8 | 2.3 | 3.8 | 2.3 | 2.5 |
| TP2 | 3.3 | 2.3 | 1.8 | 2.8 | 2.8 | 4   | 2.5 | 3   | 2.5 | 3.5 | 2.8 | 2   | 1.8 | 3.3 | 2.3 | 4.3 | 4.5 | 2.8 | 3.3 | 2.5 | 2.5 | 3.8 | 3.3 | 2.3 | 3.3 | 2.5 | 3.5 | 4.3 | 3   | 2.5 | 3.8 | 3.3 | 2.5 |
| TR  | 3.5 | 2.8 | 2.5 | 2   | 3   | 4   | 2.8 | 2.5 | 2.8 | 3   | 2   | 2   | 2   | 2.5 | 2.3 | 3.5 | 2.3 | 2.8 | 3.3 | 2.8 | 2.5 | 3.3 | 3.3 | 2.3 | 2.3 | 2.5 | 3.5 | 4.5 | 4.3 | 3.3 | 2.5 | 2.5 | 2   |
| TN  | 3.5 | 2.3 | 2.8 | 2.8 | 3.8 | 3   | 2.8 | 2.3 | 2.3 | 3   | 2.8 | 2.8 | 1.8 | 3.3 | 3   | 3   | 4   | 2.5 | 3.8 | 2   | 2.5 | 3.8 | 3.3 | 3   | 2.3 | 2.5 | 3.3 | 1.8 | 2.8 | 2.5 | 3.8 | 3.3 | 2   |
| TW  | 3.8 | 2.8 | 3   | 2.8 | 2.8 | 2.3 | 2.3 | 3.3 | 2.5 | 3   | 2.8 | 2   | 2.8 | 3.3 | 2.3 | 3.3 | 4   | 3   | 3.3 | 2.3 | 2.5 | 2.5 | 3.3 | 2   | 2.3 | 2.5 | 3.5 | 4.3 | 2.8 | 2.5 | 3.8 | 3   | 2.5 |
| TS2 | 3.8 | 2.8 | 3.3 | 2   | 3.3 | 3.8 | 2.8 | 2.5 | 2.8 | 3.5 | 2   | 2.5 | 2.8 | 2.5 | 2.8 | 3.3 | 3.3 | 2.8 | 3.3 | 2.5 | 2.5 | 3.8 | 3.3 | 3.3 | 3   | 2.5 | 2.5 | 4.8 | 3   | 2   | 3.5 | 2.5 | 3.5 |
| TJ  | 3.3 | 2.3 | 2.5 | 2.8 | 2.8 | 4   | 2.8 | 2.5 | 2.3 | 3   | 2.8 | 2   | 2.3 | 3.3 | 2.3 | 3.5 | 4   | 2.8 | 3.3 | 2.5 | 2.5 | 2.5 | 3.3 | 2.5 | 2.3 | 2.5 | 3.5 | 4.3 | 4.3 | 3   | 3.8 | 3   | 2.5 |
| TTD | 2.5 | 2.5 | 3   | 2   | 4.3 | 2.5 | 2.5 | 2   | 3.5 | 3.3 | 2   | 3.3 | 2.3 | 2.5 | 3.8 | 3.3 | 2.8 | 2.3 | 3.3 | 2.8 | 1.8 | 3.3 | 2.8 | 2.5 | 5.5 | 4.3 | 4.8 | 3.3 | 2.5 | 4   | 5   | 2.5 | 2.8 |
| KS1 | 3.3 | 2.5 | 2   | 3.3 | 1.5 | 0   | 0   | 0   | 0   | 0   | 0   | 0   | 0   | 0   | 0   | 0   | 0   | 0   | 0   | 0   | 0   | 0   | 0   | 0   | 0   | 0   | 0   | 0   | 0   | 0   | 0   | 0   | 0   |
| KS2 | 3.5 | 4.3 | 2.3 | 3.3 | 3.8 | 4.8 | 2.8 | 2.5 | 3.8 | 2.8 | 3.5 | 3   | 4   | 2.8 | 4   | 5   | 5   | 3.3 | 2.5 | 0   | 0   | 0   | 0   | 0   | 0   | 0   | 0   | 0   | 0   | 0   | 0   | 0   | 0   |
| KR  | 2.5 | 3.5 | 1.8 | 2.5 | 3.8 | 3.8 | 2.5 | 2.3 | 2.3 | 3   | 2.5 | 2.8 | 1.8 | 3   | 2.8 | 2.5 | 2.3 | 2.5 | 3.3 | 2.3 | 2.8 | 3.5 | 2.3 | 2.3 | 4.8 | 3.5 | 3.5 | 5.5 | 3   | 1.8 | 5.5 | 3   | 2.5 |
| KW  | 4.3 | 2.8 | 1.8 | 2   | 2.8 | 4.8 | 2.8 | 2.5 | 2.3 | 1.5 | 2   | 2   | 1.8 | 2.5 | 2.3 | 3.5 | 4   | 2.8 | 3.8 | 2.8 | 2.5 | 3.3 | 3.8 | 2.5 | 4.5 | 2.5 | 4.3 | 4.8 | 3.3 | 1.8 | 3.5 | 3.3 | 2.5 |
| IP  | 2.5 | 3   | 4.3 | 2   | 3.8 | 2.3 | 3   | 3   | 3.5 | 1.5 | 2   | 2.8 | 2.8 | 2.5 | 3   | 3.3 | 3.8 | 3.3 | 4.3 | 3.3 | 2.3 | 2.5 | 3.5 | 3.3 | 4.8 | 2.5 | 2.3 | 1.5 | 2.5 | 2   | 2   | 2.5 | 3.3 |
| IN  | 3   | 3.3 | 4   | 2.8 | 2.5 | 1.8 | 2.5 | 2.3 | 2.8 | 1.5 | 2.5 | 2   | 2.8 | 3.3 | 2.3 | 3.3 | 3.8 | 2.8 | 3   | 2.8 | 2.5 | 3.5 | 3.8 | 2.3 | 3.8 | 3.3 | 4   | 4.3 | 4.8 | 0.8 | 3.8 | 3.3 | 3   |
| LB1 | 1   | 1   | 2   | 1.5 | 1.5 | 2.8 | 1   | 1   | 1   | 1.8 | 1.5 | 1   | 1.8 | 1.8 | 1   | 1   | 3.5 | 1.3 | 1.3 | 1   | 1.3 | 1   | 1   | 1   | 2   | 1   | 1   | 3.3 | 1   | 1.5 | 2.3 | 2   | 1   |
| LB2 | 1   | 1   | 2   | 1.5 | 1.5 | 2.8 | 1   | 1   | 1   | 1.8 | 1.5 | 1   | 1.8 | 1.8 | 1   | 1   | 3.5 | 1.3 | 1.3 | 1   | 1.3 | 1   | 1   | 1   | 2   | 1   | 1   | 3.3 | 1   | 1.5 | 2.3 | 1.3 | 4.5 |
| LB3 | 3   | 3.8 | 3   | 2.8 | 2.8 | 3.8 | 2.3 | 2.8 | 2.8 | 3   | 2.8 | 2   | 2.8 | 3.3 | 2.3 | 3.3 | 5   | 2.8 | 3.5 | 2.5 | 2.3 | 2.5 | 3   | 2   | 3.5 | 2.5 | 3.5 | 4.8 | 3   | 2.8 | 3.5 | 3   | 2.5 |
| LY  | 4   | 3.3 | 1.8 | 2.8 | 2.8 | 3   | 2.5 | 2.5 | 2.3 | 2   | 2.8 | 2   | 1.8 | 3.3 | 2.3 | 4   | 4   | 2.8 | 4   | 2.3 | 2.8 | 2.5 | 3.3 | 2.3 | 3.5 | 2.5 | 3   | 6   | 0   | 0   | 0   | 3.3 | 2.5 |

**Figure S3.** Average degree for each phrase of rhythmic structure

|     | 0   | 1   | 2   | 3   | 4   | 5   | 6   | 7   | 8   | 9   | 10  | 11  | 12  | 13  | 14  | 15  | 16  | 17  | 18  | 19  | 20  | 21  | 22  | 23  | 24  | 25  | 26  | 27  | 28  | 29  | 30  | 31  | 32  |
|-----|-----|-----|-----|-----|-----|-----|-----|-----|-----|-----|-----|-----|-----|-----|-----|-----|-----|-----|-----|-----|-----|-----|-----|-----|-----|-----|-----|-----|-----|-----|-----|-----|-----|
| TF  | 2   | 1.5 | 4.5 | 3.5 | 4   | 2   | 4   | 5   | 2.5 | 2.5 | 2.5 | 4.5 | 3.5 | 2.5 | 5   | 2   | 6.5 | 2.5 | 2.5 | 5.5 | 2   | 2.5 | 2   | 3   | 5   | 3   | 4   | 5   | 2.5 | 2   | 4.5 | 4   | 5.5 |
| TB  | 2.5 | 1.5 | 4.5 | 5   | 4   | 6   | 3   | 5.5 | 5   | 2.5 | 3.5 | 4.5 | 3.5 | 4   | 5   | 4   | 2.5 | 4.5 | 2.5 | 5.5 | 2   | 2.5 | 2   | 3   | 5   | 3   | 4   | 5   | 2.5 | 2   | 4.5 | 4   | 5.5 |
| TS1 | 3   | 1.5 | 3.5 | 2   | 3   | 3.5 | 3.5 | 2.5 | 4   | 1.5 | 2.5 | 2   | 5   | 1.5 | 2.5 | 2.5 | 3.5 | 2.5 | 2.5 | 4   | 2   | 3   | 1.5 | 2   | 4.5 | 2   | 3   | 2.5 | 2.5 | 3   | 4   | 1.5 | 3.5 |
| TP1 | 1.5 | 1.5 | 4.5 | 5   | 3.5 | 3.5 | 1   | 2   | 4   | 2.5 | 3.5 | 4   | 3.5 | 4   | 4.5 | 1   | 3   | 4   | 2.5 | 3.5 | 2   | 3.5 | 2   | 3   | 5   | 3   | 4   | 2.5 | 2   | 2   | 3.5 | 4   | 4.5 |
| TK  | 1.5 | 1.5 | 4   | 5   | 2.5 | 3.5 | 1   | 2   | 3.5 | 1.5 | 3.5 | 2   | 4.5 | 4   | 2.5 | 3   | 3   | 4   | 2   | 3.5 | 2   | 3.5 | 2.5 | 3   | 3.5 | 2.5 | 4   | 5   | 2.5 | 1.5 | 3   | 5   | 3.5 |
| TC  | 2.5 | 1.5 | 4.5 | 4.5 | 3.5 | 5   | 3   | 5.5 | 4.5 | 2.5 | 3   | 3.5 | 3.5 | 3.5 | 4   | 3   | 5   | 4.5 | 2.5 | 5.5 | 2   | 4.5 | 1.5 | 3   | 5.5 | 3   | 4   | 5   | 2.5 | 2   | 4.5 | 4.5 | 4.5 |
| TD  | 1.5 | 1.5 | 3   | 5   | 2   | 5.5 | 2.5 | 2.5 | 2.5 | 2.5 | 3.5 | 3   | 2   | 4   | 3.5 | 2   | 5.5 | 4   | 2.5 | 3.5 | 2   | 4.5 | 2   | 1   | 5   | 3   | 4   | 2.5 | 2.5 | 2   | 4   | 5   | 3.5 |
| TP  | 2   | 1.5 | 5   | 5   | 3   | 3.5 | 3   | 2.5 | 2.5 | 2.5 | 3.5 | 1.5 | 5   | 4   | 2   | 2   | 2.5 | 4   | 2.5 | 4.5 | 2   | 3.5 | 2   | 3   | 3.5 | 2   | 3   | 4   | 2.5 | 2   | 3.5 | 5   | 2.5 |
| TT  | 1.5 | 1.5 | 4   | 2.5 | 2.5 | 5.5 | 3.5 | 2.5 | 4.5 | 2.5 | 1.5 | 2   | 4.5 | 1.5 | 2.5 | 2   | 4   | 1.5 | 2.5 | 5.5 | 2   | 4.5 | 1   | 3   | 3.5 | 3   | 4.5 | 2.5 | 2.5 | 3   | 3   | 2   | 3.5 |
| TP2 | 1.5 | 1   | 4   | 5   | 2.5 | 3.5 | 1   | 2   | 4   | 1.5 | 3.5 | 2   | 4.5 | 4   | 2.5 | 3   | 3   | 4   | 2   | 4   | 2   | 3.5 | 2.5 | 3   | 3.5 | 2.5 | 4   | 5   | 2.5 | 1.5 | 3   | 5   | 3.5 |
| TR  | 1.5 | 1.5 | 6   | 3.5 | 4   | 5   | 2.5 | 2.5 | 4.5 | 2.5 | 2.5 | 4.5 | 5   | 2.5 | 5   | 2   | 6.5 | 2.5 | 2.5 | 5   | 2   | 3.5 | 3   | 3   | 5   | 3   | 4   | 4   | 3.5 | 2.5 | 6   | 1.5 | 4.5 |
| TN  | 1.5 | 1   | 3.5 | 5   | 3.5 | 2.5 | 3.5 | 3   | 3.5 | 2   | 3.5 | 4   | 4.5 | 4   | 4.5 | 1   | 2.5 | 2   | 2.5 | 3.5 | 2   | 3   | 2   | 2.5 | 5   | 2.5 | 3.5 | 3.5 | 2.5 | 1.5 | 3.5 | 5   | 1   |
| TW  | 2.5 | 1.5 | 4.5 | 5   | 4   | 5.5 | 3   | 5.5 | 4   | 2.5 | 3.5 | 4.5 | 3.5 | 4   | 5   | 4   | 2.5 | 4.5 | 2.5 | 5.5 | 2   | 3   | 2   | 5   | 5   | 3   | 4   | 5   | 2.5 | 2   | 4.5 | 4   | 5.5 |
| TS2 | 3   | 1.5 | 4.5 | 3.5 | 3   | 5   | 4.5 | 2.5 | 4.5 | 1.5 | 2.5 | 2   | 5   | 2.5 | 2.5 | 2.5 | 3.5 | 2.5 | 2.5 | 4   | 2   | 3   | 1.5 | 3   | 4.5 | 2   | 3   | 2.5 | 2.5 | 3.5 | 4   | 3   | 3.5 |
| TJ  | 1.5 | 1.5 | 2   | 5   | 1   | 3   | 3.5 | 2.5 | 3.5 | 2.5 | 3.5 | 4.5 | 1   | 4   | 1   | 2   | 2.5 | 2.5 | 2.5 | 4   | 2   | 6   | 2   | 4.5 | 5   | 2.5 | 3.5 | 5   | 3.5 | 2   | 3.5 | 4   | 4   |
| TTD | 5.5 | 3   | 7.5 | 2.5 | 1.5 | 3   | 3.5 | 2.5 | 2   | 4.5 | 2   | 1   | 5   | 2   | 1.5 | 6.5 | 6   | 2.5 | 4   | 1   | 1.5 | 4.5 | 4   | 3.5 | 3   | 4.5 | 2   | 6.5 | 1.5 | 5   | 3   | 2.5 | 8.5 |
| KS1 | 4.5 | 3   | 8.5 | 6.5 | 7.5 | 0   | 0   | 0   | 0   | 0   | 0   | 0   | 0   | 0   | 0   | 0   | 0   | 0   | 0   | 0   | 0   | 0   | 0   | 0   | 0   | 0   | 0   | 0   | 0   | 0   | 0   | 0   | 0   |
| KS2 | 7   | 5   | 9.5 | 6   | 7   | 9   | 8   | 6.5 | 6.5 | 6.5 | 4.5 | 6.5 | 8   | 5   | 7   | 9.5 | 7.5 | 6   | 6   | 0   | 0   | 0   | 0   | 0   | 0   | 0   | 0   | 0   | 0   | 0   | 0   | 0   | 0   |
| KR  | 6.5 | 5   | 11  | 7.5 | 8.5 | 8   | 7   | 6   | 4   | 6.5 | 5.5 | 7.5 | 8   | 6   | 7.5 | 8   | 6   | 6   | 3.5 | 3.5 | 3.5 | 7.5 | 5.5 | 7.5 | 5.5 | 6   | 6   | 8   | 5   | 6   | 9   | 4.5 | 8   |
| KW  | 7.5 | 1.5 | 6   | 3   | 4.5 | 7   | 7   | 2.5 | 1   | 3   | 2.5 | 5   | 6   | 2.5 | 5.5 | 4.5 | 1.5 | 2.5 | 5   | 3.5 | 2   | 5.5 | 3   | 6.5 | 4   | 1.5 | 4.5 | 1.5 | 2.5 | 3.5 | 7.5 | 2.5 | 4   |
| IP  | 5   | 1.5 | 3   | 2   | 7   | 7.5 | 6   | 4.5 | 4.5 | 4.5 | 2   | 7   | 1.5 | 2   | 7.5 | 8   | 2   | 3.5 | 2.5 | 5   | 1.5 | 3   | 5.5 | 8   | 3.5 | 4.5 | 5   | 5   | 3   | 4.5 | 4   | 2.5 | 8   |
| IN  | 6   | 4.5 | 3   | 6.5 | 4   | 5   | 2   | 4   | 3   | 5   | 5   | 2.5 | 5   | 3   | 3   | 4   | 2   | 8.5 | 1   | 5.5 | 3.5 | 9   | 6   | 2   | 8.5 | 4   | 6   | 6.5 | 3.5 | 3.5 | 7.5 | 4   | 6   |
| LB1 | 3   | 1.5 | 4   | 4   | 7.5 | 8.5 | 6.5 | 2.5 | 3.5 | 2   | 2.5 | 7.5 | 2   | 3   | 8   | 2   | 5.5 | 2.5 | 2   | 3.5 | 3.5 | 2.5 | 4.5 | 7.5 | 1.5 | 2.5 | 2   | 2   | 3.5 | 1.5 | 4   | 3   | 8   |
| LB2 | 3   | 1.5 | 4   | 4   | 7.5 | 8.5 | 6.5 | 2.5 | 3.5 | 2   | 2.5 | 7.5 | 2   | 3   | 8   | 2   | 5.5 | 2.5 | 2   | 3.5 | 3.5 | 2.5 | 4.5 | 7.5 | 1.5 | 2.5 | 2   | 2   | 3.5 | 1.5 | 4   | 3   | 5.5 |
| LB3 | 3   | 1.5 | 4   | 4   | 7.5 | 8.5 | 6.5 | 2.5 | 3.5 | 2   | 2.5 | 7.5 | 2   | 3   | 8   | 2   | 5.5 | 2.5 | 2   | 3.5 | 3.5 | 2.5 | 4.5 | 7.5 | 1.5 | 2.5 | 2   | 2   | 3.5 | 1.5 | 4   | 3   | 8   |
| LY  | 1.5 | 3   | 12  | 2.5 | 10  | 7   | 6.5 | 8   | 6.5 | 1.5 | 3.5 | 9   | 9.5 | 2   | 9   | 8   | 4.5 | 7.5 | 3.5 | 4.5 | 1.5 | 3.5 | 5   | 7   | 6.5 | 1.5 | 2.5 | 0   | 0   | 0   | 5   | 3.5 | 7.5 |

**Figure S4.** Average degree for each phrase of melodic structure

|     | 0   | 1 | 2   | 3   | 4 | 5   | 6   | 7   | 8   | 9   | 10  | 11  | 12  | 13  | 14  | 15  | 16  | 17  | 18  | 19 | 20  | 21  | 22  | 23 | 24  | 25  | 26  | 27  | 28 | 29  | 30  | 31  | 32  |
|-----|-----|---|-----|-----|---|-----|-----|-----|-----|-----|-----|-----|-----|-----|-----|-----|-----|-----|-----|----|-----|-----|-----|----|-----|-----|-----|-----|----|-----|-----|-----|-----|
| TF  | 2   | 1 | 1   | 3   | 3 | 2   | 2   | 2   | 2   | 1.5 | 3   | 2.5 | 2   | 4   | 2.5 | 1   | 3   | 2.5 | 2.5 | 2  | 2.5 | 2.5 | 1.5 | 2  | 2   | 1.5 | 1   | 1.5 | 2  | 1.5 | 2   | 2.5 | 1.5 |
| TB  | 3   | 1 | 1   | 2.5 | 3 | 2.5 | 2   | 2   | 3   | 1.5 | 2.5 | 2.5 | 2   | 3.5 | 2.5 | 1   | 3.5 | 2.5 | 2.5 | 2  | 2.5 | 2.5 | 1.5 | 2  | 2   | 1.5 | 1   | 1.5 | 2  | 1.5 | 2   | 2.5 | 1.5 |
| TS1 | 3   | 1 | 3.5 | 3   | 3 | 2.5 | 2   | 2   | 3   | 2   | 3   | 2.5 | 3   | 4   | 2.5 | 3   | 3   | 2.5 | 2.5 | 3  | 2.5 | 3   | 1.5 | 3  | 2   | 1.5 | 1   | 2.5 | 2  | 1.5 | 2   | 3   | 2   |
| TP1 | 2   | 1 | 1   | 2.5 | 3 | 1.5 | 2   | 2.5 | 3   | 1.5 | 2.5 | 2.5 | 2   | 3.5 | 2.5 | 1   | 3   | 2.5 | 2.5 | 3  | 2.5 | 3.5 | 1.5 | 2  | 2   | 1.5 | 1   | 2.5 | 2  | 1.5 | 2   | 2.5 | 1.5 |
| TK  | 2   | 1 | 2   | 2.5 | 3 | 1.5 | 2   | 2.5 | 3   | 2   | 2.5 | 2.5 | 1   | 3.5 | 2.5 | 3   | 3   | 2.5 | 2.5 | 3  | 2.5 | 3.5 | 1.5 | 2  | 4.5 | 1.5 | 1   | 1.5 | 2  | 1.5 | 2   | 2.5 | 1.5 |
| TC  | 3   | 1 | 1   | 2   | 3 | 1.5 | 2   | 2   | 3   | 1.5 | 2   | 2.5 | 2   | 3   | 2.5 | 1   | 3   | 2.5 | 2.5 | 2  | 2.5 | 3   | 1.5 | 2  | 2   | 1.5 | 1   | 1.5 | 2  | 1.5 | 2   | 2   | 1.5 |
| TD  | 2   | 1 | 3.5 | 2.5 | 3 | 2.5 | 2   | 2   | 2   | 1.5 | 2.5 | 2.5 | 3   | 3.5 | 2.5 | 4   | 3   | 2.5 | 2.5 | 2  | 2.5 | 3   | 1.5 | 2  | 2   | 1.5 | 1   | 2.5 | 2  | 1.5 | 2   | 2.5 | 1.5 |
| TP  | 1.5 | 1 | 2   | 2.5 | 3 | 2.5 | 2   | 2   | 2   | 1.5 | 2.5 | 2.5 | 1   | 3.5 | 2.5 | 4   | 3.5 | 2.5 | 2.5 | 1  | 2.5 | 3   | 1.5 | 2  | 4.5 | 1.5 | 1   | 1.5 | 2  | 1.5 | 2   | 2.5 | 1.5 |
| TT  | 2   | 1 | 3   | 3   | 3 | 2.5 | 2   | 2   | 3   | 1.5 | 3   | 2.5 | 1   | 4   | 2.5 | 4   | 3   | 2.5 | 2.5 | 2  | 2.5 | 2.5 | 1.5 | 2  | 3   | 1.5 | 1   | 2.5 | 2  | 1.5 | 2   | 3   | 1.5 |
| TP2 | 2   | 1 | 2   | 2.5 | 3 | 1.5 | 2   | 2.5 | 3   | 2   | 2.5 | 2.5 | 1   | 3.5 | 2.5 | 3   | 3   | 2.5 | 2.5 | 3  | 2.5 | 3.5 | 1.5 | 2  | 4.5 | 1.5 | 1   | 1.5 | 2  | 1.5 | 2   | 2.5 | 1.5 |
| TR  | 2   | 1 | 3   | 3   | 3 | 1.5 | 2   | 2   | 3   | 1.5 | 3   | 2.5 | 1   | 4   | 2.5 | 4   | 3   | 2.5 | 2.5 | 3  | 2.5 | 3   | 1.5 | 2  | 2   | 1.5 | 1   | 1.5 | 2  | 1.5 | 2   | 3   | 1.5 |
| TN  | 2   | 1 | 3   | 2.5 | 3 | 2   | 2   | 2   | 3   | 1.5 | 2.5 | 2.5 | 1   | 3.5 | 2.5 | 1   | 3.5 | 2.5 | 2.5 | 3  | 2.5 | 3.5 | 1.5 | 2  | 2   | 1.5 | 1.5 | 3   | 2  | 1.5 | 2   | 2.5 | 1.5 |
| TW  | 3   | 1 | 1   | 2.5 | 3 | 2.5 | 2   | 2   | 3   | 1.5 | 2.5 | 2.5 | 2   | 3.5 | 2.5 | 1   | 3.5 | 2.5 | 2.5 | 2  | 2.5 | 2.5 | 1.5 | 2  | 2   | 1.5 | 1   | 1.5 | 2  | 1.5 | 2   | 2.5 | 1.5 |
| TS2 | 3   | 1 | 3.5 | 3   | 3 | 2.5 | 2   | 2   | 3   | 2   | 3   | 2.5 | 3   | 4   | 2.5 | 3   | 3   | 2.5 | 2.5 | 3  | 2.5 | 3   | 1.5 | 3  | 2   | 1.5 | 1   | 2.5 | 2  | 1.5 | 2   | 3   | 2   |
| TJ  | 2   | 1 | 3.5 | 2.5 | 3 | 1.5 | 2   | 2   | 3   | 1.5 | 2.5 | 2.5 | 3   | 3.5 | 2.5 | 4   | 3.5 | 2.5 | 2.5 | 3  | 2.5 | 3   | 1.5 | 2  | 2   | 1.5 | 1   | 1.5 | 2  | 1.5 | 2   | 2.5 | 1.5 |
| TTD | 2.5 | 1 | 3.5 | 3   | 2 | 4.5 | 3   | 2   | 2.5 | 4   | 3   | 1.5 | 2   | 4   | 1.5 | 2   | 1.5 | 2.5 | 2.5 | 3  | 1.5 | 2   | 2   | 2  | 5.5 | 2   | 1   | 1.5 | 1  | 2   | 2   | 2.5 | 1.5 |
| KS1 | 1.5 | 1 | 2   | 2.5 | 2 | 0   | 0   | 0   | 0   | 0   | 0   | 0   | 0   | 0   | 0   | 0   | 0   | 0   | 0   | 0  | 0   | 0   | 0   | 0  | 0   | 0   | 0   | 0   | 0  | 0   | 0   | 0   | 0   |
| KS2 | 1.5 | 1 | 2   | 2.5 | 3 | 3   | 2   | 2   | 1   | 2   | 2.5 | 2.5 | 3.5 | 1.5 | 3.5 | 3   | 3   | 2.5 | 2   | 0  | 0   | 0   | 0   | 0  | 0   | 0   | 0   | 0   | 0  | 0   | 0   | 0   | 0   |
| KR  | 1.5 | 1 | 2   | 3   | 3 | 3   | 2   | 2   | 1   | 1.5 | 3   | 2.5 | 1   | 3.5 | 2.5 | 4   | 3   | 2.5 | 2.5 | 1  | 2.5 | 3   | 1.5 | 2  | 4   | 1.5 | 1   | 2.5 | 2  | 1.5 | 2   | 2.5 | 1.5 |
| KW  | 3   | 1 | 2   | 3   | 3 | 2   | 2   | 2   | 2.5 | 1.5 | 3   | 2.5 | 1   | 4   | 2.5 | 3   | 3.5 | 2.5 | 2.5 | 3  | 2.5 | 3   | 1.5 | 2  | 2   | 1.5 | 1   | 2.5 | 2  | 1.5 | 2   | 2.5 | 1.5 |
| IP  | 1.5 | 1 | 3   | 2   | 3 | 3   | 2.5 | 2   | 1   | 2   | 2   | 2.5 | 1.5 | 3   | 2.5 | 3   | 3.5 | 2.5 | 1   | 2  | 2.5 | 2.5 | 1.5 | 3  | 4.5 | 1.5 | 1   | 3   | 2  | 1.5 | 1.5 | 2   | 1.5 |
| IN  | 1.5 | 1 | 3.5 | 2.5 | 3 | 3.5 | 2.5 | 2   | 2   | 2.5 | 2.5 | 2.5 | 3   | 3.5 | 2.5 | 2.5 | 3.5 | 2.5 | 2.5 | 2  | 2.5 | 3.5 | 1.5 | 2  | 5   | 1.5 | 1   | 1.5 | 2  | 1   | 1.5 | 2.5 | 1.5 |
| LB1 | 3   | 2 | 5.5 | 1   | 2 | 3.5 | 1   | 1   | 2   | 2.5 | 1   | 1.5 | 3.5 | 1.5 | 1.5 | 5   | 2   | 1   | 3   | 2  | 1.5 | 1   | 2   | 1  | 2   | 1.5 | 2.5 | 1.5 | 2  | 1.5 | 3   | 1   | 2   |
| LB2 | 3   | 2 | 5.5 | 1   | 2 | 3.5 | 1   | 1   | 2   | 2.5 | 1   | 1.5 | 3.5 | 1.5 | 1.5 | 5   | 2   | 1   | 3   | 2  | 1.5 | 1   | 2   | 1  | 2   | 1.5 | 2.5 | 1.5 | 2  | 1.5 | 3   | 1   | 2   |
| LB3 | 1.5 | 1 | 3.5 | 2.5 | 3 | 1.5 | 2   | 2   | 3   | 1.5 | 2.5 | 2.5 | 3   | 3.5 | 2.5 | 4   | 3   | 2.5 | 2.5 | 3  | 2.5 | 2.5 | 1.5 | 2  | 4   | 1.5 | 1   | 2.5 | 2  | 1.5 | 2   | 2.5 | 1.5 |
| LY  | 3   | 1 | 2   | 2.5 | 3 | 1.5 | 2.5 | 2   | 2   | 2.5 | 2.5 | 2.5 | 3   | 3.5 | 2.5 | 3   | 3.5 | 2.5 | 1   | 2  | 2.5 | 3   | 1.5 | 2  | 3.5 | 1.5 | 1   | 0   | 0  | 0   | 3.5 | 2.5 | 1.5 |

**Figure S5.** Average degree for each phrase of interval

|     | 0 | 1 | 2 | 3 | 4 | 5 | 6 | 7 | 8 | 9 | 10 | 11 | 12 | 13 | 14 | 15 | 16 | 17 | 18 | 19 | 20 | 21 | 22 | 23 | 24 | 25 | 26 | 27 | 28 | 29 | 30 | 31 | 32 |   |
|-----|---|---|---|---|---|---|---|---|---|---|----|----|----|----|----|----|----|----|----|----|----|----|----|----|----|----|----|----|----|----|----|----|----|---|
| TF  | 2 | 2 | 3 | 3 | 5 | 2 | 3 | 3 | 3 | 4 | 3  | 5  | 3  | 3  | 3  | 1  | 4  | 3  | 6  | 3  | 3  | 3  | 3  | 3  | 3  | 4  | 3  | 2  | 4  | 7  | 3  | 4  | 4  |   |
| TB  | 4 | 2 | 3 | 4 | 5 | 3 | 2 | 3 | 3 | 4 | 5  | 5  | 3  | 4  | 3  | 2  | 2  | 5  | 6  | 3  | 3  | 3  | 3  | 3  | 3  | 4  | 3  | 2  | 4  | 7  | 3  | 4  | 4  |   |
| TS1 | 4 | 2 | 3 | 3 | 4 | 3 | 2 | 2 | 3 | 6 | 3  | 3  | 3  | 3  | 4  | 2  | 4  | 3  | 6  | 3  | 3  | 1  | 3  | 1  | 5  | 7  | 5  | 3  | 4  | 7  | 4  | 3  | 1  |   |
| TP1 | 2 | 2 | 3 | 4 | 3 | 3 | 1 | 2 | 3 | 4 | 5  | 4  | 3  | 4  | 2  | 2  | 4  | 3  | 6  | 3  | 3  | 2  | 3  | 3  | 3  | 4  | 3  | 3  | 3  | 4  | 3  | 1  | 1  |   |
| TK  | 2 | 2 | 3 | 4 | 3 | 3 | 1 | 1 | 3 | 6 | 5  | 4  | 3  | 4  | 2  | 3  | 4  | 3  | 4  | 3  | 3  | 2  | 3  | 3  | 3  | 1  | 3  | 2  | 4  | 3  | 4  | 2  | 1  |   |
| TC  | 4 | 2 | 3 | 4 | 3 | 2 | 2 | 3 | 3 | 4 | 5  | 4  | 3  | 4  | 2  | 1  | 6  | 5  | 6  | 3  | 3  | 4  | 2  | 3  | 3  | 4  | 1  | 6  | 4  | 7  | 3  | 4  | 3  |   |
| TD  | 2 | 2 | 3 | 4 | 3 | 3 | 2 | 2 | 3 | 4 | 5  | 4  | 3  | 4  | 2  | 1  | 4  | 3  | 6  | 3  | 3  | 4  | 3  | 2  | 3  | 4  | 3  | 3  | 4  | 7  | 4  | 2  | 3  |   |
| TP  | 2 | 2 | 3 | 4 | 2 | 3 | 2 | 2 | 3 | 4 | 5  | 2  | 3  | 4  | 1  | 1  | 2  | 3  | 6  | 3  | 3  | 1  | 3  | 3  | 3  | 7  | 5  | 5  | 4  | 7  | 4  | 2  | 2  |   |
| TT  | 2 | 2 | 3 | 3 | 3 | 3 | 2 | 2 | 3 | 4 | 3  | 4  | 3  | 3  | 2  | 1  | 4  | 3  | 6  | 3  | 3  | 4  | 2  | 4  | 3  | 4  | 3  | 3  | 4  | 9  | 4  | 4  | 3  |   |
| TP2 | 2 | 2 | 3 | 4 | 3 | 3 | 1 | 2 | 3 | 6 | 5  | 4  | 3  | 4  | 2  | 3  | 4  | 3  | 4  | 3  | 3  | 2  | 2  | 3  | 3  | 1  | 3  | 2  | 4  | 3  | 4  | 4  | 3  |   |
| TR  | 2 | 2 | 3 | 3 | 5 | 3 | 2 | 2 | 3 | 4 | 3  | 5  | 3  | 3  | 3  | 1  | 4  | 3  | 6  | 3  | 3  | 3  | 2  | 3  | 3  | 4  | 3  | 7  | 2  | 2  | 2  | 3  | 4  |   |
| TN  | 2 | 2 | 3 | 4 | 3 | 3 | 2 | 2 | 3 | 2 | 5  | 4  | 3  | 4  | 2  | 1  | 2  | 3  | 4  | 3  | 3  | 5  | 3  | 3  | 3  | 1  | 5  | 2  | 2  | 3  | 4  | 4  | 2  |   |
| TW  | 4 | 2 | 3 | 4 | 5 | 3 | 2 | 3 | 3 | 4 | 5  | 5  | 3  | 4  | 3  | 1  | 2  | 5  | 6  | 3  | 3  | 3  | 3  | 4  | 3  | 4  | 3  | 2  | 2  | 7  | 3  | 4  | 4  |   |
| TS2 | 4 | 2 | 3 | 3 | 4 | 3 | 4 | 2 | 3 | 6 | 3  | 3  | 3  | 3  | 4  | 2  | 4  | 3  | 6  | 3  | 3  | 1  | 3  | 1  | 5  | 7  | 5  | 3  | 4  | 7  | 4  | 3  | 1  |   |
| TJ  | 2 | 2 | 3 | 4 | 5 | 3 | 1 | 2 | 3 | 4 | 5  | 5  | 3  | 4  | 3  | 1  | 2  | 3  | 6  | 3  | 3  | 7  | 3  | 3  | 3  | 1  | 6  | 2  | 2  | 4  | 4  | 4  | 4  |   |
| TTD | 3 | 2 | 3 | 2 | 1 | 2 | 2 | 2 | 1 | 5 | 2  | 1  | 2  | 1  | 1  | 4  | 4  | 3  | 4  | 2  | 1  | 1  | 2  | 3  | 1  | 6  | 4  | 1  | 3  | 5  | 1  | 1  | 1  |   |
| KS1 | 5 | 3 | 4 | 5 | 6 | 0 | 0 | 0 | 0 | 0 | 0  | 0  | 0  | 0  | 0  | 0  | 0  | 0  | 0  | 0  | 0  | 0  | 0  | 0  | 0  | 0  | 0  | 0  | 0  | 0  | 0  | 0  | 0  |   |
| KS2 | 5 | 1 | 5 | 5 | 7 | 4 | 2 | 4 | 2 | 2 | 4  | 7  | 4  | 4  | 5  | 3  | 7  | 4  | 7  | 0  | 0  | 0  | 0  | 0  | 0  | 0  | 0  | 0  | 0  | 0  | 0  | 0  | 0  | 0 |
| KR  | 1 | 1 | 2 | 1 | 7 | 1 | 2 | 5 | 3 | 1 | 1  | 6  | 1  | 2  | 5  | 6  | 2  | 2  | 3  | 3  | 2  | 4  | 2  | 5  | 4  | 2  | 2  | 2  | 4  | 2  | 3  | 2  | 3  |   |
| KW  | 5 | 3 | 3 | 4 | 3 | 1 | 2 | 2 | 3 | 3 | 5  | 4  | 3  | 4  | 2  | 4  | 2  | 3  | 2  | 3  | 3  | 6  | 4  | 3  | 2  | 5  | 6  | 3  | 4  | 3  | 4  | 2  | 3  |   |
| IP  | 2 | 2 | 1 | 3 | 3 | 1 | 2 | 2 | 3 | 3 | 3  | 4  | 3  | 3  | 2  | 1  | 1  | 3  | 2  | 1  | 2  | 3  | 1  | 5  | 2  | 5  | 1  | 6  | 4  | 1  | 3  | 3  | 3  |   |
| IN  | 2 | 3 | 1 | 2 | 3 | 6 | 2 | 5 | 3 | 3 | 2  | 6  | 5  | 5  | 5  | 4  | 3  | 6  | 1  | 3  | 3  | 3  | 1  | 5  | 2  | 3  | 6  | 2  | 5  | 1  | 5  | 1  | 5  |   |
| LB1 | 2 | 3 | 3 | 2 | 7 | 3 | 2 | 2 | 3 | 2 | 2  | 6  | 3  | 1  | 5  | 2  | 4  | 3  | 5  | 3  | 4  | 3  | 2  | 3  | 2  | 3  | 1  | 3  | 6  | 6  | 4  | 3  | 3  |   |
| LB2 | 2 | 3 | 3 | 2 | 7 | 3 | 2 | 2 | 3 | 2 | 2  | 6  | 3  | 1  | 5  | 2  | 4  | 3  | 5  | 3  | 4  | 3  | 2  | 3  | 2  | 3  | 1  | 3  | 6  | 6  | 4  | 3  | 3  |   |
| LB3 | 2 | 3 | 3 | 2 | 7 | 3 | 2 | 2 | 3 | 2 | 2  | 6  | 3  | 1  | 5  | 2  | 4  | 3  | 4  | 3  | 4  | 3  | 2  | 3  | 2  | 3  | 1  | 3  | 6  | 3  | 4  | 3  | 3  |   |
| LY  | 2 | 3 | 3 | 3 | 7 | 5 | 2 | 2 | 3 | 3 | 3  | 6  | 3  | 4  | 5  | 5  | 5  | 1  | 2  | 4  | 3  | 3  | 2  | 5  | 3  | 5  | 4  | 4  | 0  | 0  | 0  | 1  | 5  |   |

**Figure S6.** Average degree for each phrase of pitch

|     | 0 | 1 | 2 | 3 | 4 | 5 | 6 | 7 | 8 | 9 | 10 | 11 | 12 | 13 | 14 | 15 | 16 | 17 | 18 | 19 | 20 | 21 | 22 | 23 | 24 | 25 | 26 | 27 | 28 | 29 | 30 | 31 | 32 |
|-----|---|---|---|---|---|---|---|---|---|---|----|----|----|----|----|----|----|----|----|----|----|----|----|----|----|----|----|----|----|----|----|----|----|
| TF  | 2 | 1 | 5 | 3 | 5 | 3 | 5 | 5 | 2 | 4 | 3  | 5  | 4  | 4  | 6  | 2  | 1  | 4  | 1  | 4  | 3  | 2  | 4  | 3  | 5  | 2  | 1  | 5  | 5  | 1  | 5  | 3  | 3  |
| TB  | 2 | 1 | 5 | 4 | 5 | 1 | 5 | 5 | 1 | 4 | 4  | 5  | 4  | 5  | 6  | 1  | 6  | 4  | 1  | 4  | 3  | 2  | 4  | 3  | 5  | 2  | 1  | 5  | 5  | 1  | 5  | 3  | 3  |
| TS1 | 2 | 1 | 5 | 3 | 1 | 3 | 1 | 5 | 1 | 4 | 3  | 1  | 4  | 4  | 1  | 3  | 1  | 4  | 1  | 1  | 3  | 2  | 4  | 1  | 2  | 1  | 1  | 5  | 5  | 6  | 5  | 3  | 1  |
| TP1 | 2 | 1 | 5 | 4 | 2 | 5 | 5 | 5 | 1 | 4 | 4  | 2  | 4  | 5  | 2  | 4  | 5  | 4  | 1  | 1  | 3  | 3  | 4  | 3  | 5  | 2  | 1  | 5  | 4  | 8  | 4  | 3  | 3  |
| TK  | 2 | 1 | 5 | 4 | 2 | 5 | 5 | 5 | 1 | 4 | 4  | 2  | 4  | 5  | 3  | 5  | 5  | 4  | 1  | 1  | 3  | 3  | 4  | 3  | 5  | 2  | 1  | 5  | 2  | 1  | 4  | 3  | 3  |
| TC  | 2 | 1 | 5 | 3 | 5 | 5 | 5 | 5 | 1 | 4 | 3  | 5  | 4  | 4  | 6  | 2  | 1  | 4  | 1  | 4  | 3  | 3  | 6  | 3  | 5  | 2  | 1  | 5  | 2  | 3  | 5  | 3  | 3  |
| TD  | 2 | 1 | 5 | 4 | 2 | 1 | 1 | 5 | 2 | 4 | 4  | 2  | 4  | 4  | 3  | 3  | 4  | 4  | 1  | 1  | 3  | 3  | 4  | 3  | 5  | 2  | 1  | 5  | 2  | 1  | 5  | 3  | 3  |
| TP  | 1 | 1 | 4 | 3 | 5 | 3 | 5 | 5 | 2 | 4 | 3  | 5  | 3  | 4  | 6  | 2  | 6  | 4  | 1  | 2  | 3  | 2  | 4  | 3  | 6  | 2  | 1  | 5  | 2  | 3  | 5  | 3  | 3  |
| TT  | 2 | 1 | 6 | 3 | 2 | 1 | 1 | 5 | 1 | 4 | 3  | 2  | 4  | 4  | 3  | 2  | 1  | 4  | 1  | 4  | 3  | 2  | 3  | 3  | 5  | 1  | 1  | 5  | 2  | 7  | 4  | 2  | 3  |
| TP2 | 2 | 1 | 5 | 4 | 2 | 5 | 5 | 5 | 1 | 4 | 4  | 2  | 4  | 4  | 3  | 5  | 5  | 4  | 1  | 1  | 3  | 3  | 8  | 3  | 6  | 2  | 1  | 5  | 2  | 1  | 4  | 4  | 3  |
| TR  | 2 | 1 | 2 | 3 | 2 | 5 | 1 | 5 | 1 | 4 | 3  | 5  | 4  | 4  | 6  | 2  | 1  | 4  | 1  | 1  | 3  | 3  | 8  | 3  | 5  | 2  | 1  | 5  | 6  | 6  | 2  | 3  | 3  |
| TN  | 2 | 1 | 2 | 4 | 2 | 3 | 1 | 5 | 1 | 4 | 4  | 2  | 4  | 4  | 3  | 3  | 6  | 4  | 7  | 1  | 3  | 3  | 4  | 3  | 5  | 2  | 1  | 1  | 2  | 1  | 5  | 4  | 3  |
| TW  | 2 | 1 | 5 | 4 | 5 | 1 | 5 | 5 | 1 | 4 | 4  | 5  | 4  | 4  | 6  | 1  | 6  | 4  | 1  | 4  | 3  | 3  | 4  | 3  | 5  | 2  | 1  | 5  | 2  | 1  | 5  | 3  | 3  |
| TS2 | 2 | 1 | 5 | 3 | 2 | 3 | 1 | 5 | 1 | 4 | 3  | 4  | 4  | 4  | 5  | 3  | 1  | 4  | 1  | 1  | 3  | 2  | 4  | 1  | 2  | 1  | 1  | 5  | 2  | 6  | 5  | 3  | 1  |
| TJ  | 2 | 1 | 5 | 4 | 5 | 5 | 1 | 5 | 1 | 4 | 4  | 5  | 4  | 4  | 6  | 2  | 6  | 4  | 1  | 1  | 3  | 3  | 4  | 3  | 5  | 2  | 1  | 5  | 6  | 8  | 5  | 3  | 3  |
| TTD | 6 | 3 | 4 | 2 | 5 | 2 | 4 | 4 | 5 | 6 | 2  | 6  | 1  | 3  | 6  | 6  | 4  | 3  | 7  | 4  | 3  | 2  | 1  | 3  | 6  | 7  | 2  | 7  | 3  | 9  | 8  | 3  | 2  |
| KS1 | 3 | 1 | 1 | 3 | 2 | 0 | 0 | 0 | 0 | 0 | 0  | 0  | 0  | 0  | 0  | 0  | 0  | 0  | 0  | 0  | 0  | 0  | 0  | 0  | 0  | 0  | 0  | 0  | 0  | 0  | 0  | 0  | 0  |
| KS2 | 5 | 4 | 2 | 3 | 3 | 1 | 5 | 1 | 1 | 2 | 3  | 5  | 5  | 1  | 5  | 3  | 3  | 4  | 6  | 0  | 0  | 0  | 0  | 0  | 0  | 0  | 0  | 0  | 0  | 0  | 0  | 0  | 0  |
| KR  | 1 | 2 | 4 | 3 | 4 | 3 | 4 | 1 | 3 | 4 | 3  | 1  | 3  | 4  | 1  | 2  | 1  | 4  | 2  | 1  | 1  | 2  | 2  | 3  | 1  | 6  | 1  | 4  | 1  | 7  | 6  | 3  | 7  |
| KW  | 8 | 1 | 5 | 3 | 5 | 5 | 4 | 5 | 5 | 5 | 3  | 5  | 4  | 4  | 6  | 7  | 6  | 4  | 8  | 5  | 3  | 2  | 5  | 3  | 5  | 5  | 4  | 5  | 10 | 6  | 4  | 3  | 6  |
| IP  | 8 | 1 | 7 | 3 | 3 | 3 | 2 | 5 | 6 | 1 | 3  | 4  | 6  | 4  | 5  | 2  | 5  | 4  | 8  | 5  | 2  | 3  | 8  | 3  | 4  | 3  | 1  | 2  | 5  | 6  | 1  | 3  | 7  |
| IN  | 8 | 6 | 6 | 3 | 5 | 4 | 4 | 3 | 5 | 1 | 3  | 4  | 4  | 4  | 5  | 8  | 5  | 2  | 3  | 4  | 3  | 3  | 4  | 3  | 4  | 6  | 4  | 5  | 9  | 6  | 7  | 3  | 7  |
| LB1 | 4 | 5 | 3 | 1 | 3 | 2 | 3 | 2 | 4 | 3 | 1  | 3  | 2  | 2  | 4  | 8  | 2  | 1  | 4  | 3  | 1  | 1  | 5  | 2  | 3  | 4  | 3  | 3  | 7  | 2  | 3  | 1  | 6  |
| LB2 | 4 | 5 | 3 | 1 | 3 | 2 | 3 | 2 | 4 | 3 | 1  | 3  | 2  | 2  | 4  | 8  | 2  | 1  | 4  | 3  | 1  | 1  | 5  | 2  | 3  | 4  | 3  | 3  | 7  | 2  | 3  | 1  | 6  |
| LB3 | 7 | 6 | 5 | 3 | 4 | 5 | 5 | 5 | 5 | 4 | 3  | 4  | 4  | 4  | 5  | 9  | 5  | 4  | 5  | 4  | 3  | 2  | 7  | 3  | 5  | 6  | 4  | 5  | 9  | 4  | 5  | 3  | 4  |
| LY  | 8 | 6 | 5 | 4 | 4 | 4 | 2 | 5 | 5 | 2 | 4  | 4  | 4  | 5  | 5  | 6  | 6  | 4  | 8  | 4  | 3  | 3  | 8  | 3  | 5  | 5  | 4  | 6  | 8  | 0  | 0  | 3  | 5  |
